# Supplementary material
Source: MDPI journal article supplement (https://www.mdpi.com/2073-4352/13/7/1019)
Supplement: s1 [file s1]

ESI Table S1. Crystal data of urea/methylated urea compounds found in Cambridge Structural Database.

| CODE     | Me      | UREA      | COORD | WATER             | SP. GR.            | SOLV., ANION                       | Me...O <sub>min</sub> | Me...O <sub>max</sub> | Me...O <sub>av</sub> | Me...O <sub>diff</sub> | ANG2   | ANG3   | ANG4   | ANG5   | ANG AVE | Calc, Density | Me...Me Dist  |
|----------|---------|-----------|-------|-------------------|--------------------|------------------------------------|-----------------------|-----------------------|----------------------|------------------------|--------|--------|--------|--------|---------|---------------|---------------|
| BOPWEI   | Mn(III) | -         | HEXA  | -                 | R-3c               | ClO <sub>4</sub> <sup>-</sup>      | 1,985                 | 1,985                 | 1,985                | 0,000                  | 132,96 | 132,96 | 132,96 | 132,96 | 132,96  | 1,780         | <b>7,021</b>  |
| WITQAR   | Mn(II)  | -         | HEXA  | -                 | P2 <sub>1</sub> /c | I <sup>-</sup>                     | 2,172                 | 2,194                 | 2,183                | 0,022                  | 133,78 | 133,30 | 133,78 | 137,30 | 134,54  | 2,050         | <b>7,793</b>  |
| HEBMEG   | Mn(II)  | -         | PENTA | H <sub>2</sub> O  | P-1                | ZnCl <sub>4</sub> <sup>2-</sup>    | 2,15                  | 2,203                 | 2,177                | 0,053                  | 132,40 | 136,30 | 136,55 | 134,99 | 135,06  | 1,716         | <b>7,029</b>  |
| KADROA   | Mn(II)  | monoMe    | HEXA  | -                 | P-1                | Cl <sup>-</sup>                    | 2,158                 | 2,182                 | 2,170                | 0,024                  | 127,35 | 127,35 | 126,06 | 126,06 | 126,71  | 1,465         | <b>7,105</b>  |
| ZZZWCO01 | Mn(II)  | monoMe    | HEXA  | -                 | R-3c               | SO <sub>4</sub> <sup>2-</sup>      | 2,17                  | 2,172                 | 2,171                | 0,002                  | 127,73 | 127,70 | 127,71 | 127,73 | 127,72  | 1,366         | <b>9,336</b>  |
| YIXMUQ   | Mn(II)  | monoMe    | HEXA  | -                 | R-3c               | SO <sub>4</sub> <sup>2-</sup>      | 2,135                 | 2,138                 | 2,137                | 0,003                  | 128,08 | 128,05 | 128,06 | 128,07 | 128,07  | 1,381         | <b>9,305</b>  |
| BAVZON   | Mn(II)  | N,N-diMe  | HEXA  | -                 | P2 <sub>1</sub> /c | NO <sub>3</sub> <sup>-</sup>       | 2,141                 | 2,189                 | 2,165                | 0,048                  | 128,12 | 127,09 | 128,12 | 123,96 | 126,82  | 1,372         | <b>8,842</b>  |
| BAVZON   | Mn(II)  | N,N-diMe  | DI    | 4H <sub>2</sub> O | P2 <sub>1</sub> /c | NO <sub>3</sub> <sup>-</sup>       | 2,093                 | 2,093                 | 2,093                | 0,000                  | 144,84 | 144,84 | 144,84 | 144,84 | 144,84  | 1,372         | <b>8,842</b>  |
| AKITET   | Mn(II)  | N,N'-diMe | HEXA  | -                 | P-1                | ClO <sub>4</sub> <sup>-</sup>      | 2,16                  | 2,174                 | 2,167                | 0,014                  | 131,54 | 129,91 | 131,54 | 128,11 | 130,27  | 1,401         | <b>8,043</b>  |
| JANXEB   | Mn(II)  | N,N'-diEt | HEXA  | -                 | P-1                | MnBr <sub>4</sub> <sup>2-</sup>    | 2,164                 | 2,289                 | 2,227                | 0,125                  | 143,28 | 125,57 | 143,28 | 154,02 | 141,54  | 1,390         | <b>11,738</b> |
| MANJIU   | Fe(III) | -         | HEXA  | -                 | P6 <sub>1</sub>    | I <sub>3</sub> <sup>-</sup>        | 1,961                 | 2,025                 | 1,993                | 0,064                  | 137,48 | 132,80 | 132,29 | 139,23 | 135,45  | 2,961         | <b>6,976</b>  |
| WITQEV   | Fe(II)  | -         | HEXA  | -                 | R-3                | I <sup>-</sup>                     | 1,987                 | 1,994                 | 1,991                | 0,007                  | 136,34 | 136,37 | 136,16 | 136,18 | 136,26  | 1,780         | <b>6,966</b>  |
| own data | Fe(III) | -         | HEXA  | -                 | C2                 | NO <sub>3</sub> <sup>-</sup>       | 1,96                  | 2,039                 | 2,000                | 0,079                  | 130,15 | 136,25 | 137,41 | 141,05 | 136,22  | 1,658         | <b>6,740</b>  |
| own data | Fe(III) | N,N-diMe  | TETRA | 2H <sub>2</sub> O | P-1                | NO <sub>3</sub> <sup>-</sup>       | 1,96                  | 2,009                 | 1,985                | 0,049                  | 131,75 | 133,74 | 136,53 | 141,35 | 135,84  | 1,513         | <b>9,421</b>  |
| own data | Fe(III) | N,N-diMe  | HEXA  | -                 | R-3                | NO <sub>3</sub> <sup>-</sup>       | 1,989                 | 1,992                 | 1,991                | 0,003                  | 131,85 | 131,85 | 134,53 | 134,53 | 133,19  | 1,337         | <b>6,750</b>  |
| own data | Fe(III) | N,N'-diMe | HEXA  | -                 | R-3                | NO <sub>3</sub> <sup>-</sup>       | 2,005                 | 2,005                 | 2,005                | 0,000                  | 133,63 | 133,63 | 133,63 | 133,63 | 133,63  | 1,229         | <b>10,275</b> |
| BENVIZ   | Fe(III) | N,N'-diMe | HEXA  | -                 | C2/c               | ClO <sub>4</sub> <sup>-</sup>      | 1,989                 | 2,023                 | 2,006                | 0,034                  | 130,00 | 138,62 | 131,53 | 131,53 | 132,92  | 1,429         | <b>10,038</b> |
| EURFEC   | Fe(II)  | N,N'-diEt | HEXA  | -                 | P-1                | ClO <sub>4</sub> <sup>-</sup>      | 2,104                 | 2,105                 | 2,105                | 0,001                  | 127,70 | 112,45 | 127,70 | 129,54 | 124,34  | 1,284         | <b>9,142</b>  |
| FOWQOX   | Co(II)  | -         | HEXA  | -                 | C2                 | urea, I <sub>3</sub> <sup>-</sup>  | 2,02                  | 2,167                 | 2,094                | 0,147                  | 135,05 | 128,58 | 135,05 | 122,57 | 130,31  | 2,434         | <b>9,128</b>  |
| URCONT   | Co(II)  | -         | HEXA  | -                 | P-1                | urea, NO <sub>3</sub> <sup>-</sup> | 2,069                 | 2,082                 | 2,076                | 0,013                  | 131,82 | 127,26 | 131,82 | 131,96 | 130,71  | 1,527         | <b>7,350</b>  |
| RUBLEG   | Co(II)  | -         | HEXA  | -                 | P2 <sub>1</sub> /c | urea, I <sup>-</sup>               | 2,091                 | 2,11                  | 2,101                | 0,019                  | 133,61 | 130,28 | 133,61 | 131,08 | 132,15  | 1,775         | <b>7,268</b>  |

|          |        |           |       |                   |                    |                                                    |       |       |       |       |        |        |        |        |        |       |               |
|----------|--------|-----------|-------|-------------------|--------------------|----------------------------------------------------|-------|-------|-------|-------|--------|--------|--------|--------|--------|-------|---------------|
| URCOSM01 | Co(II) | -         | HEXA  | -                 | Pbc2 <sub>1</sub>  | H <sub>2</sub> O,<br>SO <sub>4</sub> <sup>2-</sup> | 2,085 | 2,162 | 2,124 | 0,077 | 131,89 | 132,26 | 126,61 | 135,66 | 131,61 | 1,612 | <b>7,569</b>  |
| WITLIU   | Co(II) | -         | HEXA  | -                 | P-1                | I <sub>8</sub> <sup>2-</sup>                       | 2,075 | 2,107 | 2,091 | 0,032 | 132,28 | 133,61 | 131,33 | 133,37 | 132,65 | 2,856 | <b>6,188</b>  |
| COLLAQ   | Co(II) | -         | HEXA  | -                 | P2 <sub>1</sub> /c | urea, Br <sup>-</sup>                              | 2,078 | 2,098 | 2,088 | 0,020 | 131,68 | 130,27 | 131,68 | 132,70 | 131,58 | 1,650 | <b>7,193</b>  |
| EPAMEO   | Co(II) | -         | PENTA | H <sub>2</sub> O  | P-1                | ZnCl <sub>4</sub> <sup>2-</sup>                    | 2,082 | 2,131 | 2,107 | 0,049 | 133,25 | 135,55 | 131,68 | 134,91 | 133,85 | 1,766 | <b>7,572</b>  |
| ACOURN01 | Co(II) | -         | TETRA | 2H <sub>2</sub> O | P2 <sub>1</sub> /n | NO <sub>3</sub> <sup>-</sup>                       | 2,087 | 2,09  | 2,089 | 0,003 | 139,54 | 139,54 | 136,11 | 136,11 | 137,82 | 1,731 | <b>6,466</b>  |
| FADGEX   | Co(II) | -         | TETRA | 2H <sub>2</sub> O | P2 <sub>1</sub>    | I <sup>-</sup>                                     | 2,054 | 2,13  | 2,092 | 0,076 | 135,68 | 134,81 | 137,58 | 136,80 | 136,22 | 2,177 | <b>7,290</b>  |
| ATURCO   | Co(II) | -         | DI    | 4H <sub>2</sub> O | P-1                | NO <sub>3</sub> <sup>-</sup>                       | 2,06  | 2,06  | 2,060 | 0,000 | 130,21 | 130,21 | 130,21 | 130,21 | 130,21 | 1,879 | <b>5,110</b>  |
| FADGAT   | Co(II) | -         | DI    | 4H <sub>2</sub> O | Pca2 <sub>1</sub>  | CoI <sub>4</sub> <sup>2-</sup>                     | 2,048 | 2,12  | 2,084 | 0,072 | 132,49 | 132,49 | 134,85 | 134,85 | 133,67 | 2,780 | <b>5,151</b>  |
| MURCOA   | Co(II) | monoMe    | HEXA  | -                 | R-3c               | SO <sub>4</sub> <sup>2-</sup>                      | 2,097 | 2,097 | 2,097 | 0,000 | 127,84 | 127,84 | 127,84 | 127,84 | 127,84 | 1,413 | <b>9,254</b>  |
| MURCOB   | Co(II) | monoMe    | HEXA  | -                 | R-3c               | S <sub>2</sub> O <sub>3</sub> <sup>2-</sup>        | 2,099 | 2,099 | 2,099 | 0,000 | 127,39 | 127,39 | 127,39 | 127,39 | 127,39 | 1,422 | <b>9,260</b>  |
| ZZZEU001 | Co(II) | monoMe    | HEXA  | -                 | P-1                | NO <sub>3</sub> <sup>-</sup>                       | 2,089 | 2,108 | 2,099 | 0,019 | 126,68 | 127,19 | 126,92 | 126,92 | 126,93 | 1,464 | <b>7,036</b>  |
| QAZZEZ   | Co(II) | monoMe    | HEXA  | -                 | R-3c               | SO <sub>4</sub> <sup>2-</sup>                      | 2,095 | 2,098 | 2,097 | 0,003 | 127,87 | 127,88 | 127,86 | 127,90 | 127,88 | 1,409 | <b>9,258</b>  |
| ZIJWEU   | Co(II) | N,N-diMe  | HEXA  | -                 | P2 <sub>1</sub> /c | NO <sub>3</sub> <sup>-</sup>                       | 2,076 | 2,13  | 2,103 | 0,054 | 129,94 | 126,80 | 129,94 | 126,37 | 128,26 | 1,407 | <b>10,027</b> |
| ZIJWEU   | Co(II) | N,N-diMe  | DI    | 4H <sub>2</sub> O | P2 <sub>1</sub> /c | NO <sub>3</sub> <sup>-</sup>                       | 2,03  | 2,03  | 2,030 | 0,000 | 139,66 | 139,66 | 139,66 | 139,66 | 139,66 | 1,407 | <b>10,027</b> |
| LUTRIB   | Co(II) | N,N'-diMe | HEXA  | -                 | P-1                | ClO <sub>4</sub> <sup>-</sup>                      | 2,099 | 2,112 | 2,106 | 0,013 | 130,92 | 130,28 | 130,92 | 128,68 | 130,20 | 1,413 | <b>10,710</b> |
| LUTROH   | Co(II) | N,N'-diMe | HEXA  | -                 | P-1                | BF <sub>4</sub> <sup>-</sup>                       | 2,091 | 2,098 | 2,095 | 0,007 | 131,13 | 130,13 | 131,13 | 128,46 | 130,21 | 1,401 | <b>10,670</b> |
| LUTRUN   | Co(II) | N,N'-diMe | HEXA  | -                 | P-1                | NO <sub>3</sub> <sup>-</sup>                       | 2,089 | 2,106 | 2,098 | 0,017 | 131,02 | 131,73 | 131,02 | 126,07 | 129,96 | 1,382 | <b>7,858</b>  |
| HAHKEJ   | Co(II) | N,N'-diEt | HEXA  | -                 | P-1                | ClO <sub>4</sub> <sup>-</sup>                      | 2,09  | 2,1   | 2,095 | 0,010 | 129,85 | 129,85 | 129,37 | 129,37 | 129,61 | 1,298 | <b>9,052</b>  |
| HAHKAF   | Co(II) | N,N'-diEt | HEXA  | -                 | P2 <sub>1</sub> /c | BF <sub>4</sub> <sup>-</sup>                       | 2,088 | 2,113 | 2,101 | 0,025 | 132,51 | 132,51 | 127,66 | 127,66 | 130,08 | 1,243 | <b>9,495</b>  |
| FOWQIR   | Ni(II) | -         | HEXA  | -                 | C2                 | urea, I <sub>3</sub> <sup>-</sup>                  | 2,04  | 2,084 | 2,062 | 0,044 | 118,78 | 124,46 | 118,78 | 123,71 | 121,43 | 2,444 | <b>9,107</b>  |
| ADUFEK   | Ni(II) | -         | HEXA  | -                 | P2 <sub>1</sub> /c | urea, Cl <sup>-</sup>                              | 2,05  | 2,068 | 2,059 | 0,018 | 131,96 | 131,24 | 131,96 | 131,52 | 131,67 | 1,508 | <b>7,174</b>  |
| XIMFOP   | Ni(II) | -         | TETRA | 2H <sub>2</sub> O | P2 <sub>1</sub> /n | NO <sub>3</sub> <sup>-</sup>                       | 2,059 | 2,064 | 2,062 | 0,005 | 139,16 | 139,16 | 136,07 | 136,07 | 137,62 | 1,744 | <b>6,458</b>  |
| YIXNAX   | Ni(II) | monoMe    | HEXA  | -                 | R-3c               | SO <sub>4</sub> <sup>2-</sup>                      | 2,091 | 2,093 | 2,092 | 0,002 | 128,24 | 128,22 | 128,25 | 128,21 | 128,23 | 1,404 | <b>9,279</b>  |
| QAZZEZ   | Ni(II) | monoMe    | HEXA  | -                 | R-3c               | SO <sub>4</sub> <sup>2-</sup>                      | 2,095 | 2,098 | 2,097 | 0,003 | 127,87 | 127,88 | 127,86 | 127,90 | 127,88 | 1,409 | <b>9,261</b>  |
| YEWFAH   | Ni(II) | N,N-diMe  | HEXA  | -                 | P2 <sub>1</sub> /c | NO <sub>3</sub> <sup>-</sup>                       | 2,043 | 2,089 | 2,066 | 0,046 | 130,07 | 126,76 | 130,07 | 126,36 | 128,32 | 1,420 | <b>10,001</b> |
| YEWFAH   | Ni(II) | N,N-diMe  | DI    | 4H <sub>2</sub> O | P2 <sub>1</sub> /c | NO <sub>3</sub> <sup>-</sup>                       | 2,028 | 2,028 | 2,028 | 0,000 | 137,65 | 137,65 | 137,65 | 137,65 | 137,65 | 1,420 | <b>10,001</b> |

|          |        |           |       |                   |                    |                                                    |       |       |       |       |        |        |        |        |        |       |               |
|----------|--------|-----------|-------|-------------------|--------------------|----------------------------------------------------|-------|-------|-------|-------|--------|--------|--------|--------|--------|-------|---------------|
| AKITIX   | Ni(II) | N,N'-diMe | HEXA  | -                 | P-1                | ClO <sub>4</sub> <sup>-</sup>                      | 2,059 | 2,068 | 2,064 | 0,009 | 131,06 | 130,69 | 131,06 | 129,04 | 130,46 | 1,434 | <b>8,022</b>  |
| HAHJOS   | Ni(II) | N,N'-diEt | HEXA  | -                 | P-1                | ClO <sub>4</sub> <sup>-</sup>                      | 2,068 | 2,076 | 2,072 | 0,008 | 130,23 | 130,23 | 129,37 | 129,37 | 129,80 | 1,294 | <b>9,063</b>  |
| FAXKOE   | Zn(II) | -         | HEXA  | -                 | Pbc2 <sub>1</sub>  | H <sub>2</sub> O,<br>SO <sub>4</sub> <sup>2-</sup> | 2,081 | 2,182 | 2,132 | 0,101 | 130,01 | 130,67 | 135,66 | 127,30 | 130,91 | 1,635 | <b>10,047</b> |
| UREAZN01 | Zn(II) | -         | HEXA  | -                 | C2/c               | NO <sub>3</sub> <sup>-</sup>                       | 2,067 | 2,137 | 2,102 | 0,070 | 131,24 | 127,74 | 131,24 | 132,76 | 130,74 | 1,718 | <b>7,406</b>  |
| KESTUA   | Zn(II) | -         | TETRA | 2H <sub>2</sub> O | C2/c               | Zn(NCS) <sub>4</sub> <sup>2-</sup>                 | 2,052 | 2,17  | 2,111 | 0,118 | 133,13 | 133,13 | 127,88 | 127,88 | 130,50 | 1,790 | <b>5,024</b>  |
| KUJCAU   | Zn(II) | -         | TETRA | 2H <sub>2</sub> O | P2 <sub>1</sub> /n | NO <sub>3</sub> <sup>-</sup>                       | 2,075 | 2,089 | 2,082 | 0,014 | 136,27 | 136,27 | 139,43 | 139,43 | 137,85 | 1,794 | <b>6,424</b>  |
| ZZZWCK01 | Zn(II) | monoMe    | HEXA  | -                 | R-3c               | SO <sub>4</sub> <sup>2-</sup>                      | 2,082 | 2,082 | 2,082 | 0,000 | 128,06 | 128,06 | 128,06 | 128,06 | 128,06 | 1,432 | <b>9,241</b>  |
| ZIJWIY   | Zn(II) | N,N'-diMe | HEXA  | -                 | P2 <sub>1</sub> /c | NO <sub>3</sub> <sup>-</sup>                       | 2,065 | 2,13  | 2,098 | 0,065 | 126,77 | 129,70 | 126,77 | 127,15 | 127,60 | 1,422 | <b>10,030</b> |
| ZIJWIY   | Zn(II) | N,N'-diMe | DI    | 4H <sub>2</sub> O | P2 <sub>1</sub> /c | NO <sub>3</sub> <sup>-</sup>                       | 2,051 | 2,051 | 2,051 | 0,000 | 139,19 | 139,19 | 139,19 | 139,19 | 139,19 | 1,422 | <b>10,030</b> |
| AKITUJ   | Zn(II) | N,N'-diMe | HEXA  | -                 | P-1                | ClO <sub>4</sub> <sup>-</sup>                      | 2,089 | 2,104 | 2,097 | 0,015 | 128,65 | 130,22 | 128,65 | 131,09 | 129,65 | 1,442 | <b>8,024</b>  |
| HAHJUY   | Zn(II) | N,N'-diEt | HEXA  | -                 | P-1                | ClO <sub>4</sub> <sup>-</sup>                      | 2,108 | 2,112 | 2,110 | 0,004 | 129,49 | 129,49 | 128,65 | 129,58 | 129,30 | 1,294 | <b>9,092</b>  |

**ESI Table S2.** Bond lengths [ $\text{\AA}$ ] and angles [ $^\circ$ ] of compound **1**.

---

|                     |            |
|---------------------|------------|
| Fe(1)-O(2)          | 2.0048(11) |
| Fe(1)-O(2)#1        | 2.0048(11) |
| Fe(1)-O(2)#2        | 2.0048(11) |
| Fe(1)-O(2)#3        | 2.0048(11) |
| Fe(1)-O(2)#4        | 2.0048(11) |
| Fe(1)-O(2)#5        | 2.0048(11) |
| O(2)-C(3)           | 1.282(2)   |
| O(9)-N(8)           | 1.2500(12) |
| N(6)-C(3)           | 1.333(2)   |
| N(6)-C(7)           | 1.447(2)   |
| N(6)-H(6)           | 0.8800     |
| N(4)-C(3)           | 1.322(2)   |
| N(4)-C(5)           | 1.462(2)   |
| N(4)-H(4)           | 0.8800     |
| C(7)-H(7A)          | 0.9800     |
| C(7)-H(7B)          | 0.9800     |
| C(7)-H(7C)          | 0.9800     |
| C(5)-H(5A)          | 0.9800     |
| C(5)-H(5B)          | 0.9800     |
| C(5)-H(5C)          | 0.9800     |
| O(2)-Fe(1)-O(2)#1   | 92.17(5)   |
| O(2)-Fe(1)-O(2)#2   | 180.0      |
| O(2)#1-Fe(1)-O(2)#2 | 87.83(5)   |
| O(2)-Fe(1)-O(2)#3   | 87.83(5)   |
| O(2)#1-Fe(1)-O(2)#3 | 180.00(7)  |
| O(2)#2-Fe(1)-O(2)#3 | 92.17(5)   |
| O(2)-Fe(1)-O(2)#4   | 92.17(5)   |
| O(2)#1-Fe(1)-O(2)#4 | 92.17(5)   |
| O(2)#2-Fe(1)-O(2)#4 | 87.83(5)   |
| O(2)#3-Fe(1)-O(2)#4 | 87.83(5)   |
| O(2)-Fe(1)-O(2)#5   | 87.83(5)   |
| O(2)#1-Fe(1)-O(2)#5 | 87.83(5)   |
| O(2)#2-Fe(1)-O(2)#5 | 92.17(5)   |
| O(2)#3-Fe(1)-O(2)#5 | 92.17(5)   |
| O(2)#4-Fe(1)-O(2)#5 | 180.0      |
| C(3)-O(2)-Fe(1)     | 133.63(10) |
| O(9)#6-N(8)-O(9)    | 120.000(3) |
| O(9)#6-N(8)-O(9)#7  | 119.998(3) |
| O(9)-N(8)-O(9)#7    | 119.996(3) |
| C(3)-N(6)-C(7)      | 125.07(14) |
| C(3)-N(6)-H(6)      | 117.5      |
| C(7)-N(6)-H(6)      | 117.5      |
| C(3)-N(4)-C(5)      | 122.11(16) |
| C(3)-N(4)-H(4)      | 118.9      |
| C(5)-N(4)-H(4)      | 118.9      |
| O(2)-C(3)-N(4)      | 119.32(15) |
| O(2)-C(3)-N(6)      | 120.20(14) |
| N(4)-C(3)-N(6)      | 120.49(15) |
| N(6)-C(7)-H(7A)     | 109.5      |
| N(6)-C(7)-H(7B)     | 109.5      |
| H(7A)-C(7)-H(7B)    | 109.5      |
| N(6)-C(7)-H(7C)     | 109.5      |
| H(7A)-C(7)-H(7C)    | 109.5      |
| H(7B)-C(7)-H(7C)    | 109.5      |
| N(4)-C(5)-H(5A)     | 109.5      |
| N(4)-C(5)-H(5B)     | 109.5      |
| H(5A)-C(5)-H(5B)    | 109.5      |
| N(4)-C(5)-H(5C)     | 109.5      |
| H(5A)-C(5)-H(5C)    | 109.5      |
| H(5B)-C(5)-H(5C)    | 109.5      |

---

Symmetry transformations used to generate equivalent atoms:

#1 -x+y+1,-x+2,z #2 -x+2,-y+2,-z+1 #3 x-y+1,x,-z+1

#4 -y+2,x-y+1,z #5 y,-x+y+1,-z+1 #6 -y+1,x-y+1,z

#7 -x+y,-x+1,z

**ESI Table S3.** Torsion angles for compound **1** [°]

---

|                      |             |
|----------------------|-------------|
| Fe(1)-O(2)-C(3)-N(4) | -144.18(14) |
| Fe(1)-O(2)-C(3)-N(6) | 35.8(2)     |
| C(5)-N(4)-C(3)-O(2)  | 4.5(3)      |
| C(5)-N(4)-C(3)-N(6)  | -175.56(19) |
| C(7)-N(6)-C(3)-O(2)  | 177.72(16)  |
| C(7)-N(6)-C(3)-N(4)  | -2.3(3)     |

---

Symmetry transformations used to generate equivalent atoms:

#1 -x+y+1,-x+2,z   #2 -x+2,-y+2,-z+1   #3 x-y+1,x,-z+1

#4 -y+2,x-y+1,z   #5 y,-x+y+1,-z+1   #6 -y+1,x-y+1,z

#7 -x+y,-x+1,z

**ESI Table S4.** Bond lengths [Å] and angles [°] of compound **2**.

|                |          |                |          |
|----------------|----------|----------------|----------|
| Fe1-O2         | 1.970(2) | Fe1-O2#1       | 1.970(2) |
| Fe1-O1#1       | 2.009(2) | Fe1-O1         | 2.009(2) |
| Fe1-O1W        | 2.026(2) | Fe1-O1W#1      | 2.026(2) |
| O1-C1          | 1.292(3) | O2-C4          | 1.282(4) |
| N1-C1          | 1.329(4) | N1-C3          | 1.458(4) |
| N1-C2          | 1.460(4) | N2-C1          | 1.329(4) |
| N3-C4          | 1.331(4) | N4-C4          | 1.332(4) |
| N4-C5          | 1.453(4) | N4-C6          | 1.458(4) |
| Fe2-O4         | 1.960(2) | Fe2-O4#2       | 1.960(2) |
| Fe2-O3#2       | 2.002(2) | Fe2-O3         | 2.002(2) |
| Fe2-O2W        | 2.033(2) | Fe2-O2W#2      | 2.033(2) |
| O3-C7          | 1.285(3) | O4-C10         | 1.275(4) |
| N5-C7          | 1.330(4) | N5-C8          | 1.452(4) |
| N5-C9          | 1.462(4) | N6-C7          | 1.322(4) |
| N7-C10         | 1.337(4) | N8-C10         | 1.323(4) |
| N8-C12         | 1.452(4) | N8-C11         | 1.455(4) |
| O5-N9          | 1.260(3) | O6-N9          | 1.240(3) |
| O7-N9          | 1.214(4) | O8-N10         | 1.253(3) |
| O9-N10         | 1.249(3) | O10-N10        | 1.245(3) |
| O11-N11        | 1.215(4) | O12-N11        | 1.225(4) |
| O13-N11        | 1.260(3) |                |          |
| O2-Fe1-O2#1    | 180.0    | O2-Fe1-O1#1    | 88.67(8) |
| O2#1-Fe1-O1#1  | 91.33(8) | O2-Fe1-O1      | 91.33(8) |
| O2#1-Fe1-O1    | 88.67(8) | O1#1-Fe1-O1    | 180.0    |
| O2-Fe1-O1W     | 90.03(8) | O2#1-Fe1-O1W   | 89.97(8) |
| O1#1-Fe1-O1W   | 90.69(8) | O1-Fe1-O1W     | 89.31(8) |
| O2-Fe1-O1W#1   | 89.97(8) | O2#1-Fe1-O1W#1 | 90.03(8) |
| O1#1-Fe1-O1W#1 | 89.31(8) | O1-Fe1-O1W#1   | 90.69(8) |
| O1W-Fe1-O1W#1  | 180.0    | C1-O1-Fe1      | 131.8(2) |
| C4-O2-Fe1      | 136.5(2) | C1-N1-C3       | 122.6(3) |
| C1-N1-C2       | 120.7(3) | C3-N1-C2       | 116.6(3) |
| C4-N4-C5       | 121.2(3) | C4-N4-C6       | 120.4(3) |
| C5-N4-C6       | 116.9(3) | O1-C1-N1       | 120.0(3) |
| O1-C1-N2       | 119.2(3) | N1-C1-N2       | 120.8(3) |
| O2-C4-N3       | 120.7(3) | O2-C4-N4       | 119.5(3) |
| N3-C4-N4       | 119.8(3) | O4-Fe2-O4#2    | 180.0    |
| O4-Fe2-O3#2    | 88.62(8) | O4#2-Fe2-O3#2  | 91.38(8) |
| O4-Fe2-O3      | 91.38(8) | O4#2-Fe2-O3    | 88.62(8) |
| O3#2-Fe2-O3    | 180.0    | O4-Fe2-O2W     | 91.25(9) |
| O4#2-Fe2-O2W   | 88.75(9) | O3#2-Fe2-O2W   | 90.19(9) |
| O3-Fe2-O2W     | 89.81(9) | O4-Fe2-O2W#2   | 88.75(9) |
| O4#2-Fe2-O2W#2 | 91.26(9) | O3#2-Fe2-O2W#2 | 89.81(9) |
| O3-Fe2-O2W#2   | 90.19(9) | O2W-Fe2-O2W#2  | 180.0    |
| C7-O3-Fe2      | 133.7(2) | C10-O4-Fe2     | 141.4(2) |
| C7-N5-C8       | 120.6(3) | C7-N5-C9       | 121.6(3) |
| C8-N5-C9       | 117.1(3) | C10-N8-C12     | 121.9(3) |
| C10-N8-C11     | 120.8(3) | C12-N8-C11     | 117.1(3) |
| O3-C7-N6       | 120.2(3) | O3-C7-N5       | 119.5(3) |
| N6-C7-N5       | 120.2(3) | O4-C10-N8      | 119.5(3) |
| O4-C10-N7      | 120.1(3) | N8-C10-N7      | 120.4(3) |
| O7-N9-O6       | 120.6(3) | O7-N9-O5       | 119.8(3) |
| O6-N9-O5       | 119.6(3) | O10-N10-O9     | 119.9(3) |
| O10-N10-O8     | 120.4(3) | O9-N10-O8      | 119.7(3) |
| O11-N11-O12    | 122.4(3) | O11-N11-O13    | 117.8(3) |
| O12-N11-O13    | 119.7(3) |                |          |

Symmetry codes to generate equivalent atoms:

1. [2\_756] -x+2,-y,-z+1
2. [2\_665] -x+1,-y+1,-z

**ESI Table S5.** Torsion angles [°] of compound **2**.

---

|               |           |               |           |
|---------------|-----------|---------------|-----------|
| Fe1-O1-C1-N1  | -106.6(3) | Fe1-O1-C1-N2  | 75.6(3)   |
| C3-N1-C1-O1   | -176.3(3) | C2-N1-C1-O1   | 3.0(4)    |
| C3-N1-C1-N2   | 1.5(5)    | C2-N1-C1-N2   | -179.2(3) |
| Fe1-O2-C4-N3  | 28.7(4)   | Fe1-O2-C4-N4  | -154.1(2) |
| C5-N4-C4-O2   | 14.5(4)   | C6-N4-C4-O2   | 180.0(3)  |
| C5-N4-C4-N3   | -168.3(3) | C6-N4-C4-N3   | -2.8(4)   |
| Fe2-O3-C7-N6  | -78.7(4)  | Fe2-O3-C7-N5  | 103.6(3)  |
| C8-N5-C7-O3   | 2.5(5)    | C9-N5-C7-O3   | 172.7(3)  |
| C8-N5-C7-N6   | -175.2(3) | C9-N5-C7-N6   | -5.0(5)   |
| Fe2-O4-C10-N8 | 169.6(2)  | Fe2-O4-C10-N7 | -12.7(5)  |
| C12-N8-C10-O4 | -177.9(3) | C11-N8-C10-O4 | -3.8(5)   |
| C12-N8-C10-N7 | 4.4(5)    | C11-N8-C10-N7 | 178.5(3)  |

---

**ESI Table S6.** Bond lengths [Å] and angles [°] of compound **3**.

---

|                     |            |
|---------------------|------------|
| Fe(1)-O(2)#1        | 2.0094(13) |
| Fe(1)-O(2)#2        | 2.0094(13) |
| Fe(1)-O(2)          | 2.0094(13) |
| Fe(1)-O(8)#2        | 2.0169(13) |
| Fe(1)-O(8)#1        | 2.0169(13) |
| Fe(1)-O(8)          | 2.0169(13) |
| O(8)-C(9)           | 1.285(2)   |
| O(2)-C(3)           | 1.279(2)   |
| O(16)-N(14)         | 1.243(2)   |
| N(11)-C(9)          | 1.330(2)   |
| N(11)-C(12)         | 1.462(2)   |
| N(11)-C(13)         | 1.463(2)   |
| O(17)-N(14)         | 1.251(2)   |
| N(14)-O(15)         | 1.244(2)   |
| N(10)-C(9)          | 1.336(2)   |
| N(4)-C(3)           | 1.330(3)   |
| N(5)-C(3)           | 1.335(3)   |
| N(5)-C(6)           | 1.452(3)   |
| N(5)-C(7)           | 1.463(3)   |
|                     |            |
| O(2)#1-Fe(1)-O(2)#2 | 90.36(6)   |
| O(2)#1-Fe(1)-O(2)   | 90.36(6)   |
| O(2)#2-Fe(1)-O(2)   | 90.36(6)   |
| O(2)#1-Fe(1)-O(8)#2 | 89.76(5)   |
| O(2)#2-Fe(1)-O(8)#2 | 88.70(5)   |
| O(2)-Fe(1)-O(8)#2   | 179.05(5)  |
| O(2)#1-Fe(1)-O(8)#1 | 88.70(5)   |
| O(2)#2-Fe(1)-O(8)#1 | 179.05(5)  |
| O(2)-Fe(1)-O(8)#1   | 89.76(5)   |
| O(8)#2-Fe(1)-O(8)#1 | 91.19(6)   |
| O(2)#1-Fe(1)-O(8)   | 179.05(5)  |
| O(2)#2-Fe(1)-O(8)   | 89.76(5)   |
| O(2)-Fe(1)-O(8)     | 88.70(5)   |
| O(8)#2-Fe(1)-O(8)   | 91.19(6)   |
| O(8)#1-Fe(1)-O(8)   | 91.19(6)   |
| C(9)-O(8)-Fe(1)     | 132.23(11) |
| C(3)-O(2)-Fe(1)     | 131.72(12) |
| C(9)-N(11)-C(12)    | 120.55(14) |
| C(9)-N(11)-C(13)    | 121.02(15) |
| C(12)-N(11)-C(13)   | 118.43(14) |
| O(16)-N(14)-O(15)   | 120.91(17) |
| O(16)-N(14)-O(17)   | 120.35(17) |
| O(15)-N(14)-O(17)   | 118.74(17) |
| C(3)-N(5)-C(6)      | 120.50(18) |
| C(3)-N(5)-C(7)      | 121.3(2)   |
| C(6)-N(5)-C(7)      | 118.1(2)   |
| O(8)-C(9)-N(11)     | 119.51(15) |
| O(8)-C(9)-N(10)     | 120.40(15) |
| N(11)-C(9)-N(10)    | 120.08(15) |
| O(2)-C(3)-N(4)      | 120.27(17) |
| O(2)-C(3)-N(5)      | 118.66(18) |
| N(4)-C(3)-N(5)      | 121.05(18) |

---

Symmetry transformations used to generate equivalent atoms:

#1 -y+1,x-y+1,z    #2 -x+y,-x+1,z

**ESI Table S7.** Torsion angles [°] of compound **3**.

---

|                        |             |
|------------------------|-------------|
| Fe(1)-O(8)-C(9)-N(11)  | -145.74(14) |
| Fe(1)-O(8)-C(9)-N(10)  | 34.8(3)     |
| C(12)-N(11)-C(9)-O(8)  | -179.66(17) |
| C(13)-N(11)-C(9)-O(8)  | 1.0(3)      |
| C(12)-N(11)-C(9)-N(10) | -0.2(3)     |
| C(13)-N(11)-C(9)-N(10) | -179.53(18) |
| Fe(1)-O(2)-C(3)-N(4)   | 39.4(3)     |
| Fe(1)-O(2)-C(3)-N(5)   | -141.98(15) |
| C(6)-N(5)-C(3)-O(2)    | 2.3(3)      |
| C(7)-N(5)-C(3)-O(2)    | 180.0(2)    |
| C(6)-N(5)-C(3)-N(4)    | -179.1(2)   |
| C(7)-N(5)-C(3)-N(4)    | -1.4(3)     |

---

Symmetry transformations used to generate equivalent atoms:

#1 -y+1,x-y+1,z    #2 -x+y,-x+1,z

**ESI Table S8.** Analysis of Potential Hydrogen Bonds and Schemes with  $d(D...A) < R(D)+R(A)+0.50$ ,  $d(H...A) < R(H)+R(A)-0.12$  Ang.,  $D-H...A > 100.0$  Deg in compound **1**

| <b>Nr</b> | <b>Donor</b> | <b>--- H....Acceptor</b> | <b>Symm. op.</b> | <b>D - H</b> | <b>H...A</b> | <b>D...A</b> | <b>D - H...A</b> |
|-----------|--------------|--------------------------|------------------|--------------|--------------|--------------|------------------|
| 1         | N4           | --H4 ..O9                | x,y,z            | 0.88         | 2.05         | 2.925(2)     | 170              |
| 2         | N6           | --H6 ..O2                | 1-x+y,2-x,z      | 0.88         | 2.10         | 2.884(2)     | 149              |

**ESI Table S9.** Analysis of Potential Hydrogen Bonds and Schemes with  $d(D...A) < R(D)+R(A)+0.50$ ,  $d(H...A) < R(H)+R(A)-0.12$  Ang.,  $D-H...A > 100.0$  Deg in compound **2**.

| Nr | Donor --- H....Acceptor | Symm. op.   | D - H | H...A | D...A    | D - H...A |
|----|-------------------------|-------------|-------|-------|----------|-----------|
| 1  | O1W --H1WA ..O8         | 1-x,1-y,1-z | 0.85  | 1.82  | 2.663(3) | 174       |
| 2  | O1W --H1WB ..O6         | 1+x,y,z     | 0.85  | 1.83  | 2.672(3) | 169       |
| 3  | N2 --H2A ..O7           | 1-x,-y,1-z  | 0.86  | 2.17  | 2.916(4) | 146       |
| 4  | N2 --H2B ..O9           | 1-x,-y,1-z  | 0.86  | 2.07  | 2.912(4) | 165       |
| 5  | O2W --H2WA ..O11        | x,y,z       | 0.85  | 2.5   | 3.190(4) | 138       |
| 6  | O2W --H2WA ..O13        | x,y,z       | 0.85  | 1.79  | 2.611(4) | 162       |
| 7  | N3 --H3A ..O1           | Intra       | 0.86  | 2.08  | 2.829(3) | 145       |
| 8  | N3 --H3B ..O10          | x,y,z       | 0.86  | 2.19  | 2.987(4) | 155       |
| 9  | O2W --H2WB ..O5         | x,y,z       | 0.85  | 1.84  | 2.680(4) | 170       |
| 10 | N6 --H6D ..O5           | 1-x,1-y,-z  | 0.86  | 2.24  | 2.970(4) | 143       |
| 11 | N6 --H6E ..O12          | x,1+y,z     | 0.86  | 2.11  | 2.942(5) | 164       |
| 12 | N7 --H7A ..O3           | Intra       | 0.86  | 2.09  | 2.828(3) | 143       |
| 13 | N7 --H7B ..O12          | 2-x,-y,-z   | 0.86  | 2.09  | 2.867(5) | 151       |
| 14 | C2 --H2C ..O1           | Intra       | 0.98  | 2.28  | 2.724(4) | 107       |
| 15 | C3 --H3E ..O9           | 1-x,-y,1-z  | 0.98  | 2.58  | 3.217(4) | 122       |
| 16 | C5 --H5A ..O2           | Intra       | 0.98  | 2.36  | 2.734(4) | 102       |
| 17 | C8 --H8A ..O2W          | Intra       | 0.98  | 2.4   | 3.346(6) | 161       |
| 18 | C8 --H8A ..O3           | Intra       | 0.98  | 2.34  | 2.706(4) | 101       |
| 19 | C8 --H8B ..O10          | 1-x,1-y,1-z | 0.98  | 2.44  | 3.376(4) | 161       |
| 20 | C8 --H8C ..O6           | 1+x,y,z     | 0.98  | 2.53  | 3.352(6) | 141       |
| 21 | C11 --H11A ..O11        | 1-x,-y,-z   | 0.98  | 2.48  | 3.047(6) | 117       |
| 22 | C11 --H11C ..O4         | Intra       | 0.98  | 2.35  | 2.699(4) | 100       |
| 23 | C12 --H12C ..O6         | 1-x,-y,-z   | 0.98  | 2.4   | 3.373(5) | 171       |

**ESI Table S10.** Analysis of Potential Hydrogen Bonds and Schemes with  $d(D...A) < R(D)+R(A)+0.50$ ,  $d(H...A) < R(H)+R(A)-0.12$  Ang.,  $D-H...A > 100.0$  Deg in compound **3**

| Nr | Donor | H....  | Acceptor | Symm. op.            | D - H | H...A | D...A    | D - H...A |
|----|-------|--------|----------|----------------------|-------|-------|----------|-----------|
| 1  | N4    | --H4A  | ..O2     | 1-y,1+x-y,z          | 0.88  | 2.16  | 2.916(3) | 144       |
| 2  | N4    | --H4B  | ..O18    | x,y,z                | 0.88  | 2.05  | 2.850(3) | 152       |
| 3  | N10   | --H10A | ..O8     | -x+y,1-x,z           | 0.88  | 2.12  | 2.893(2) | 145       |
| 4  | N10   | --H10B | ..O16    | 1/3+x-y,-1/3+x,2/3-z | 0.88  | 2.10  | 2.954(2) | 164       |
| 5  | O18   | --H18A | ..O17    | x,y,z                | 0.87  | 1.94  | 2.800(3) | 169       |
| 6  | O18   | --H18B | ..O15    | 5/3-y,4/3+x-y,1/3+z  | 0.87  | 2.27  | 3.108(3) | 161       |
| 7  | O18   | --H18B | ..O17    | 5/3-y,4/3+x-y,1/3+z  | 0.87  | 2.36  | 3.099(3) | 142       |
| 8  | C6    | --H6A  | ..O2     | Intra                | 0.98  | 2.24  | 2.689(4) | 107       |
| 9  | C6    | --H6C  | ..O15    | 4/3-x,5/3-y,2/3-z    | 0.98  | 2.41  | 3.213(3) | 139       |
| 10 | C7    | --H7B  | ..O15    | 1+x-y,x,1-z          | 0.98  | 2.55  | 3.509(4) | 166       |
| 11 | C13   | --H13C | ..O8     | Intra                | 0.98  | 2.29  | 2.720(3) | 106       |

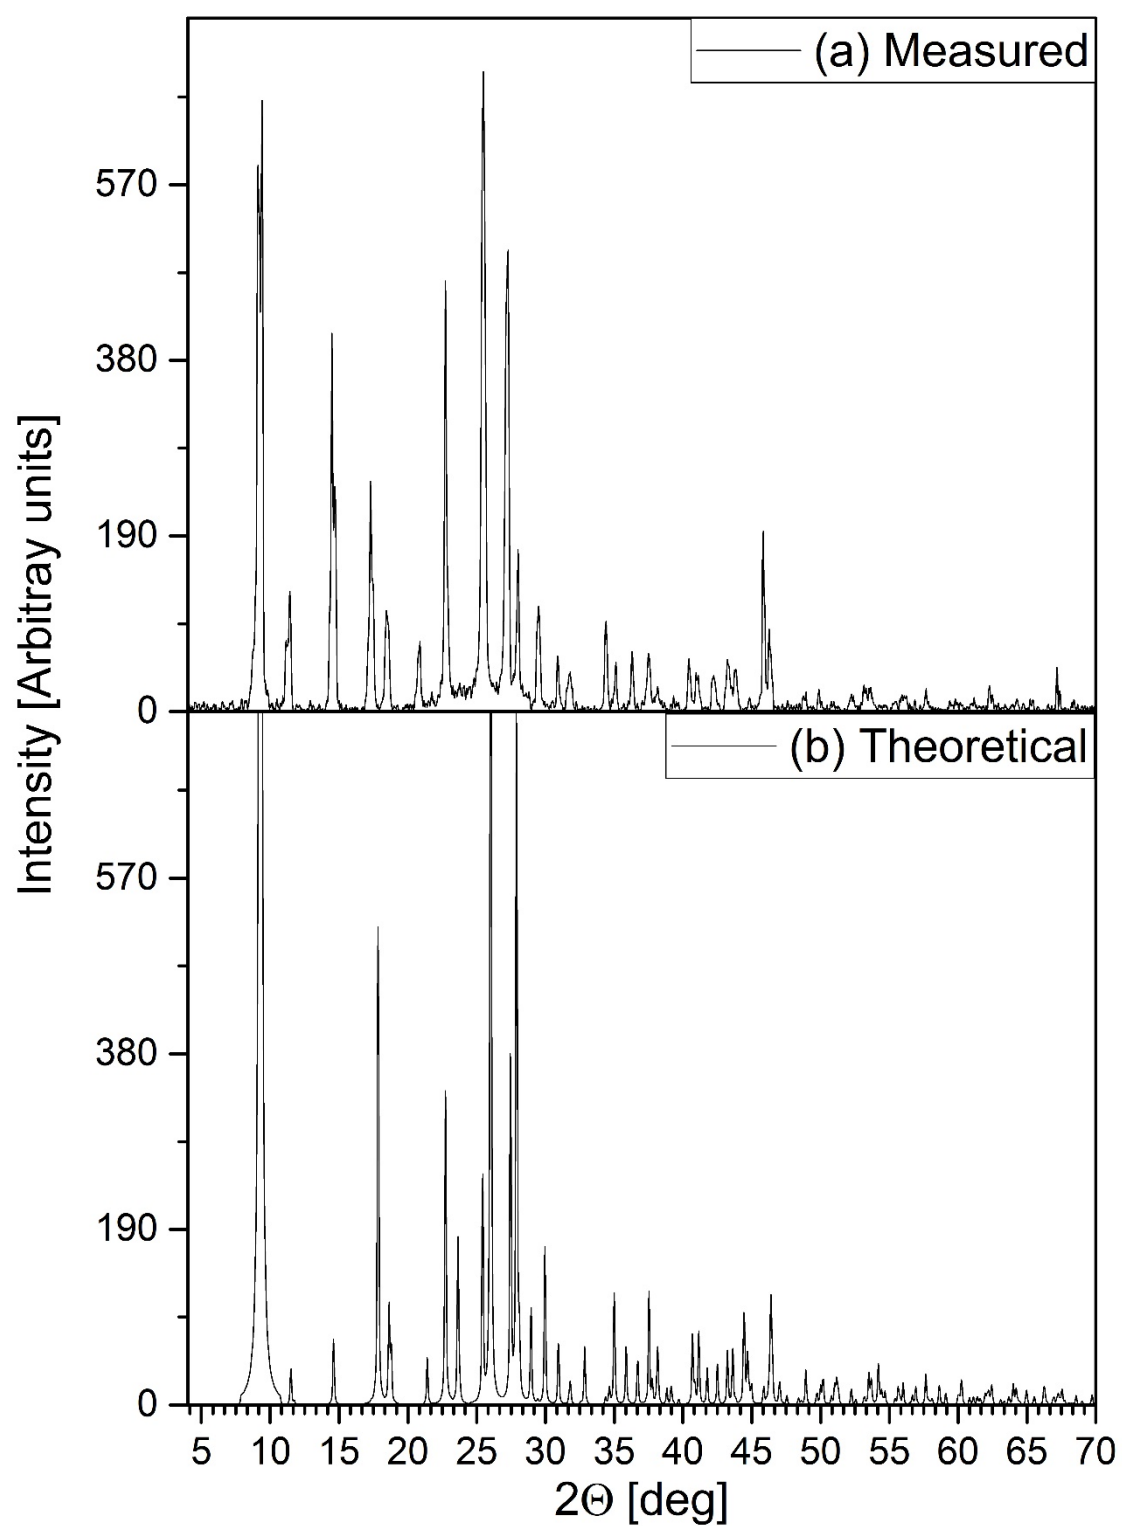

ESI Figure S1. The calculated and the experimental powder X-ray diffraction of compound 1.

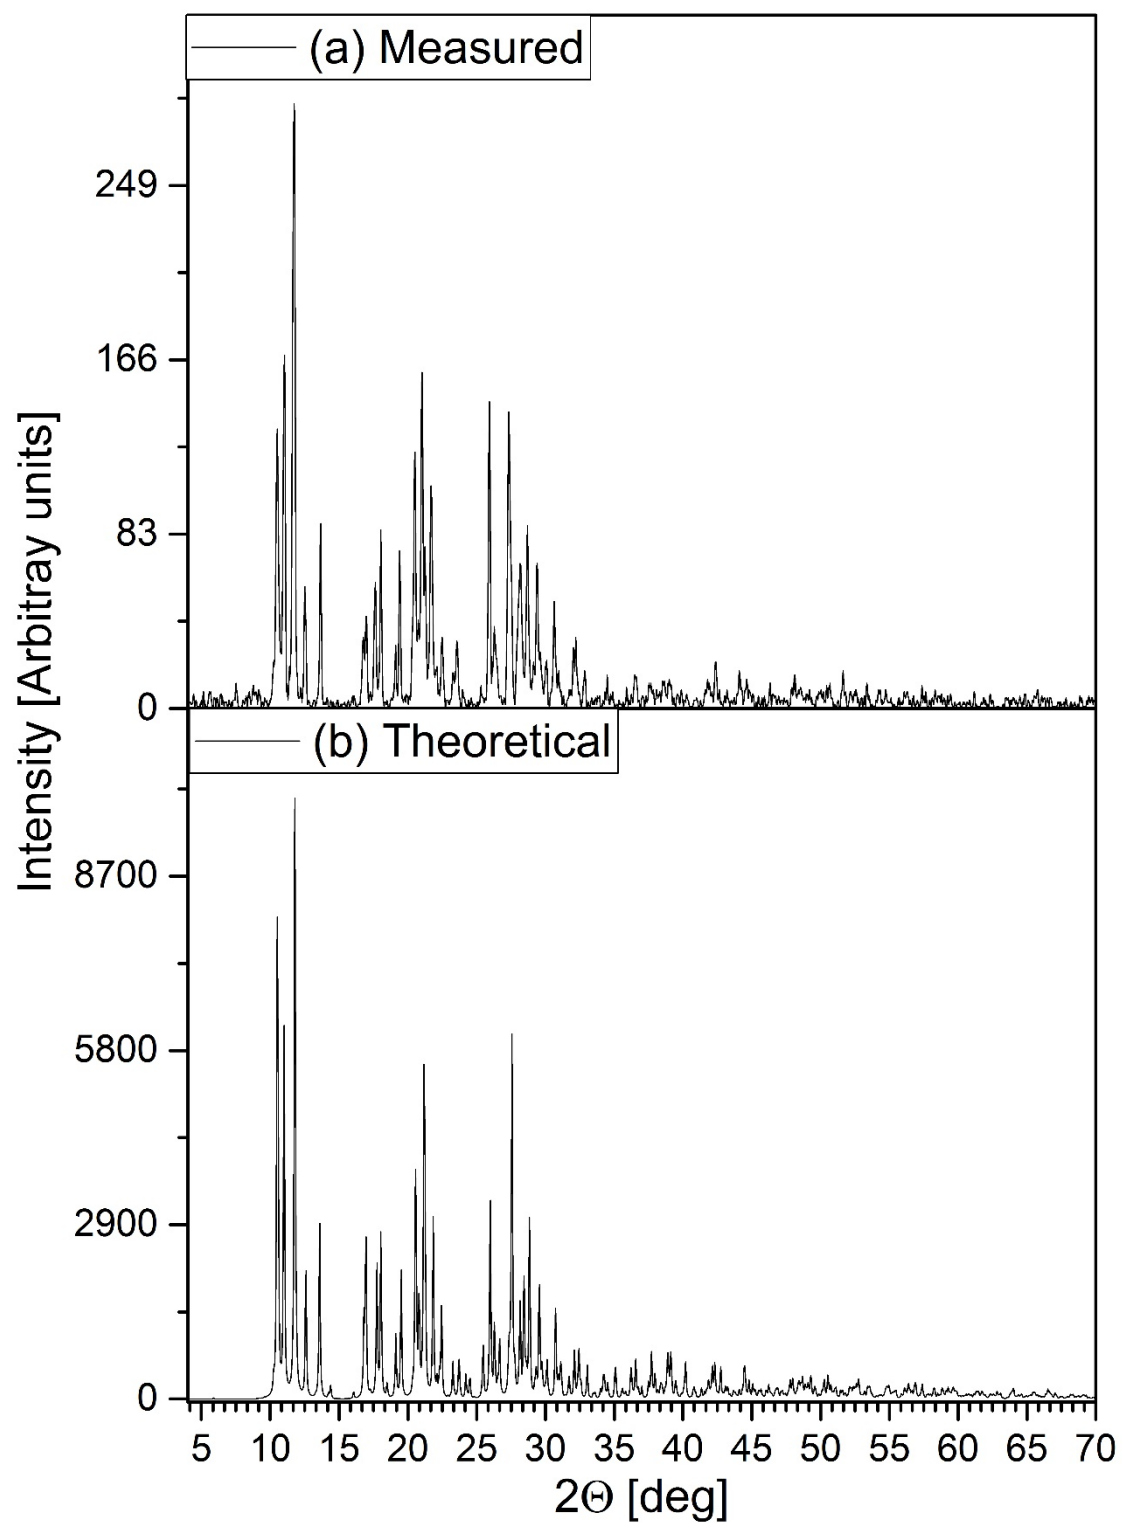

ESI Figure S2. The calculated and the experimental powder X-ray diffraction of compound 2.

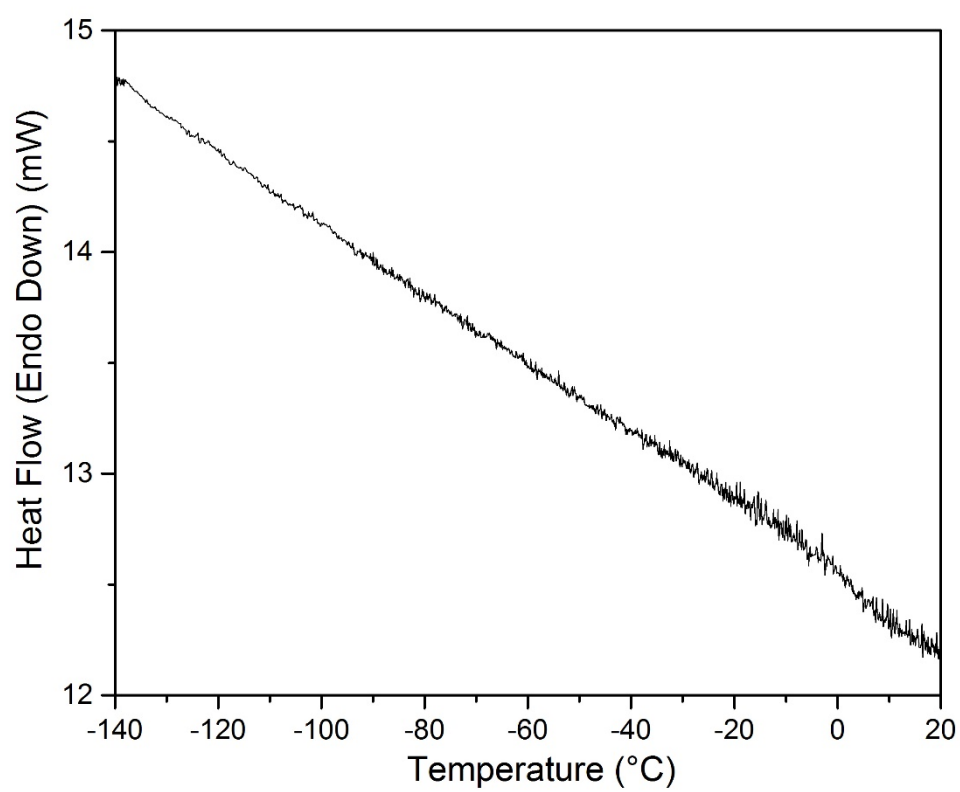

ESI Figure S3. The low-temperature DSC of compound **1**.

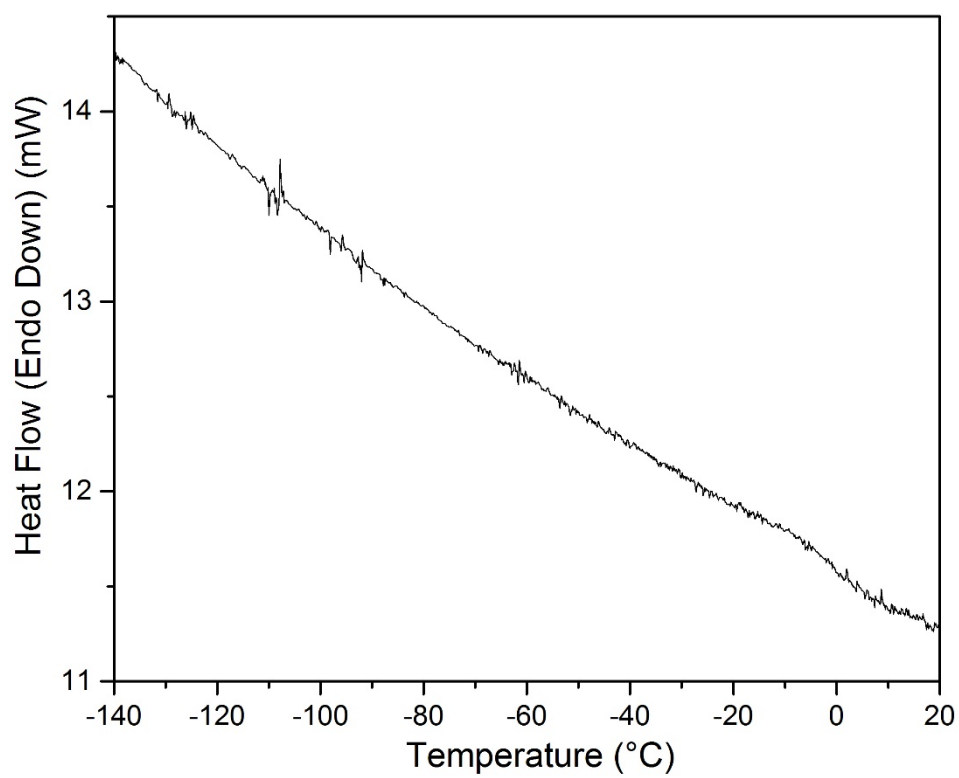

ESI Figure S4. The low-temperature DSC of compound **2**.

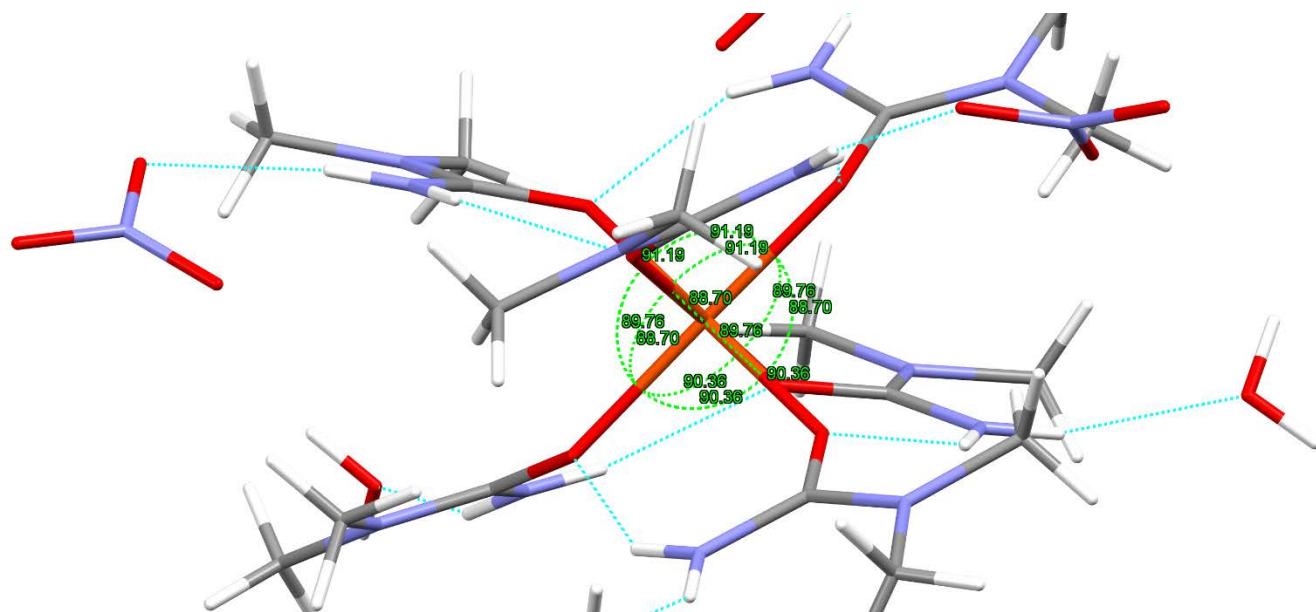

ESI Figure S5. Coordination geometry of compound 3.

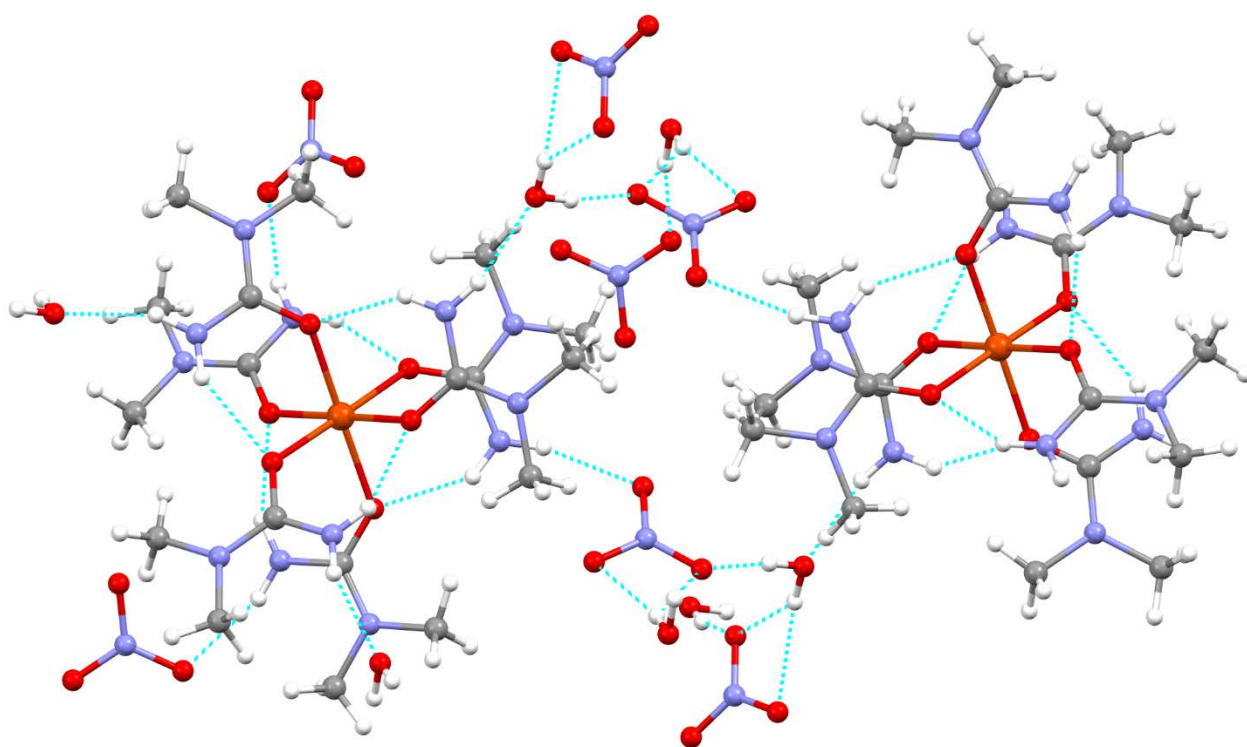

ESI Figure S6. Intra- and intermolecular hydrogen bonding system in compound **3**.

**ESI Table S11.** Torsion angles [ $^{\circ}$ ] of nitrate ions in compound **2**.

---

|                   |          |
|-------------------|----------|
| O(12)-N(11)-O(13) | 119.8(3) |
| O(11)-N(11)-O(12) | 122.5(4) |
| O(11)-N(11)-O(13) | 117.8(3) |
| O(6)-N(9)-O(7)    | 120.6(3) |
| O(7)-N(9)-O(5)    | 119.8(3) |
| O(5)-N(9)-O(6)    | 119.6(3) |
| O(9)-N(10)-O(10)  | 119.9(3) |
| O(10)-N(10)-O(8)  | 120.4(3) |
| O(8)-N(10)-O(9)   | 119.7(3) |

---

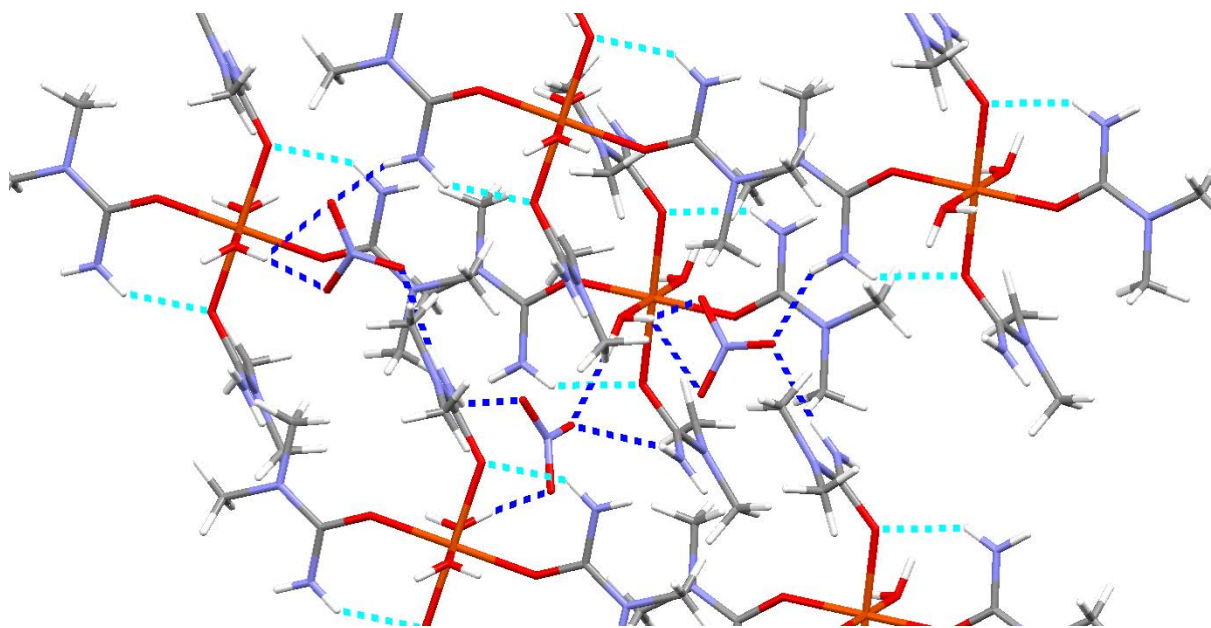

ESI Figure S7. Intra- and intermolecular hydrogen bonding system in compound 2.

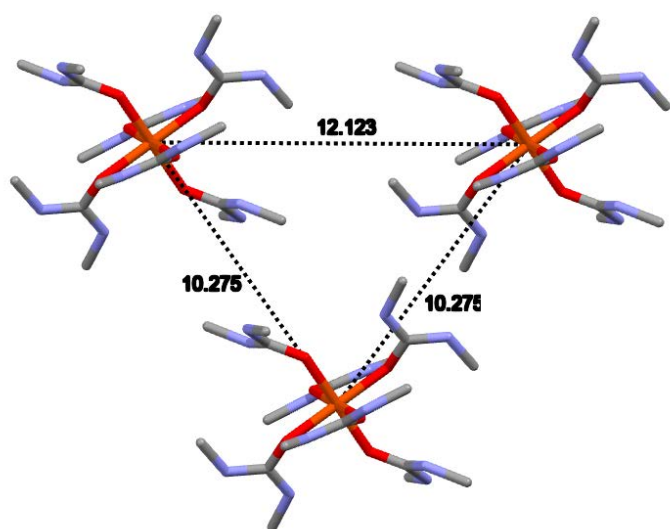

ESI Figure S8. The Fe-Fe distances in compound **1**.

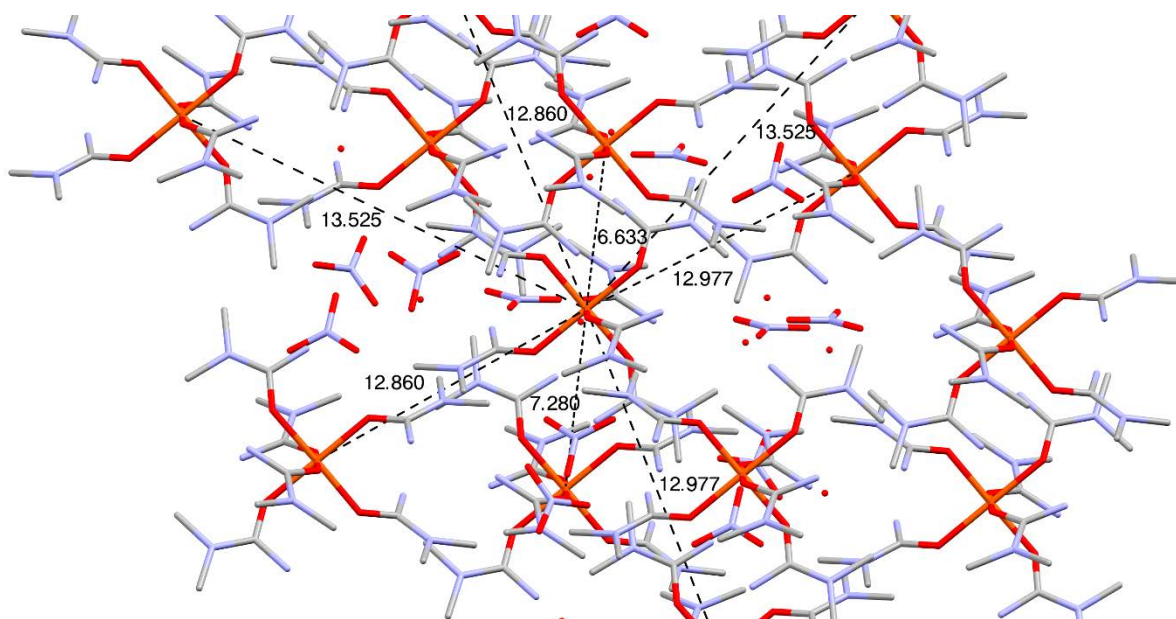

ESI Figure S9. The Fe-Fe distances in compound 3.

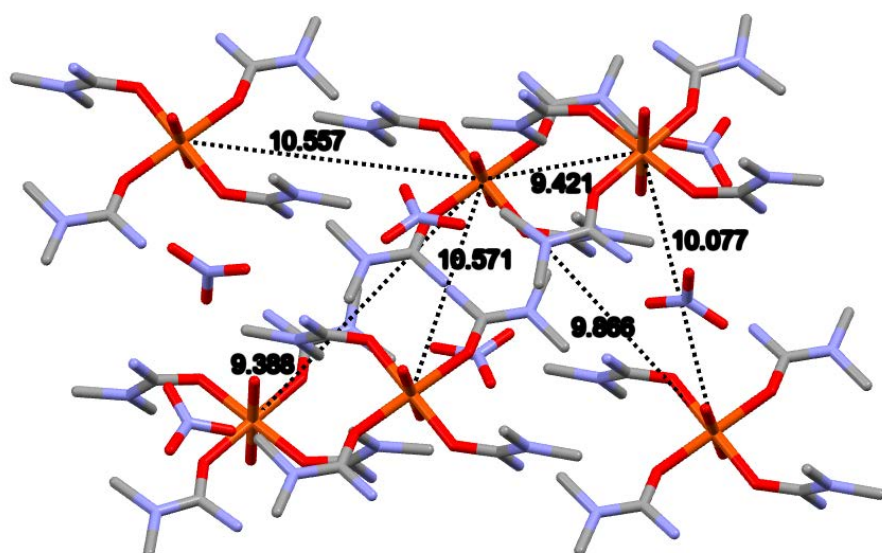

ESI Figure S10. The Fe-Fe distances in compound 2.

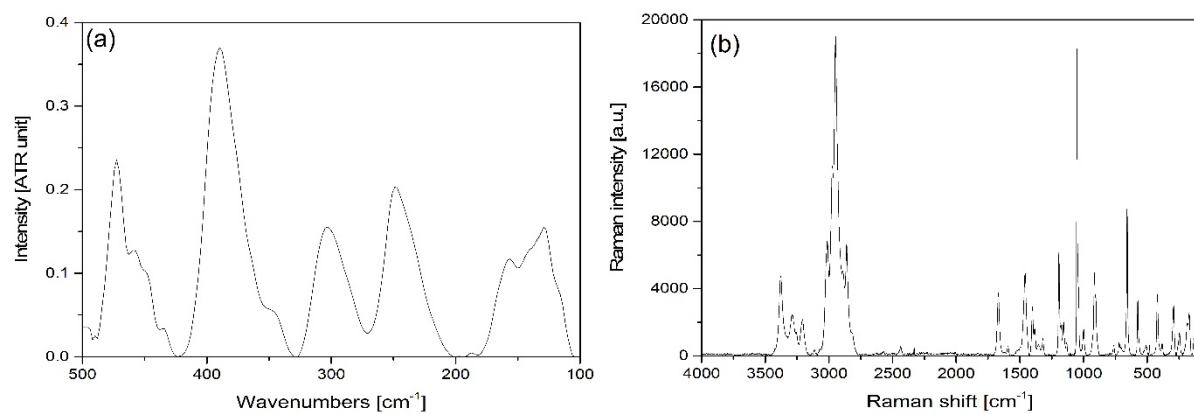

ESI Figure S11. (a) Far-range and (b) analytical rang IR spectra of compound **1** at room temperature.

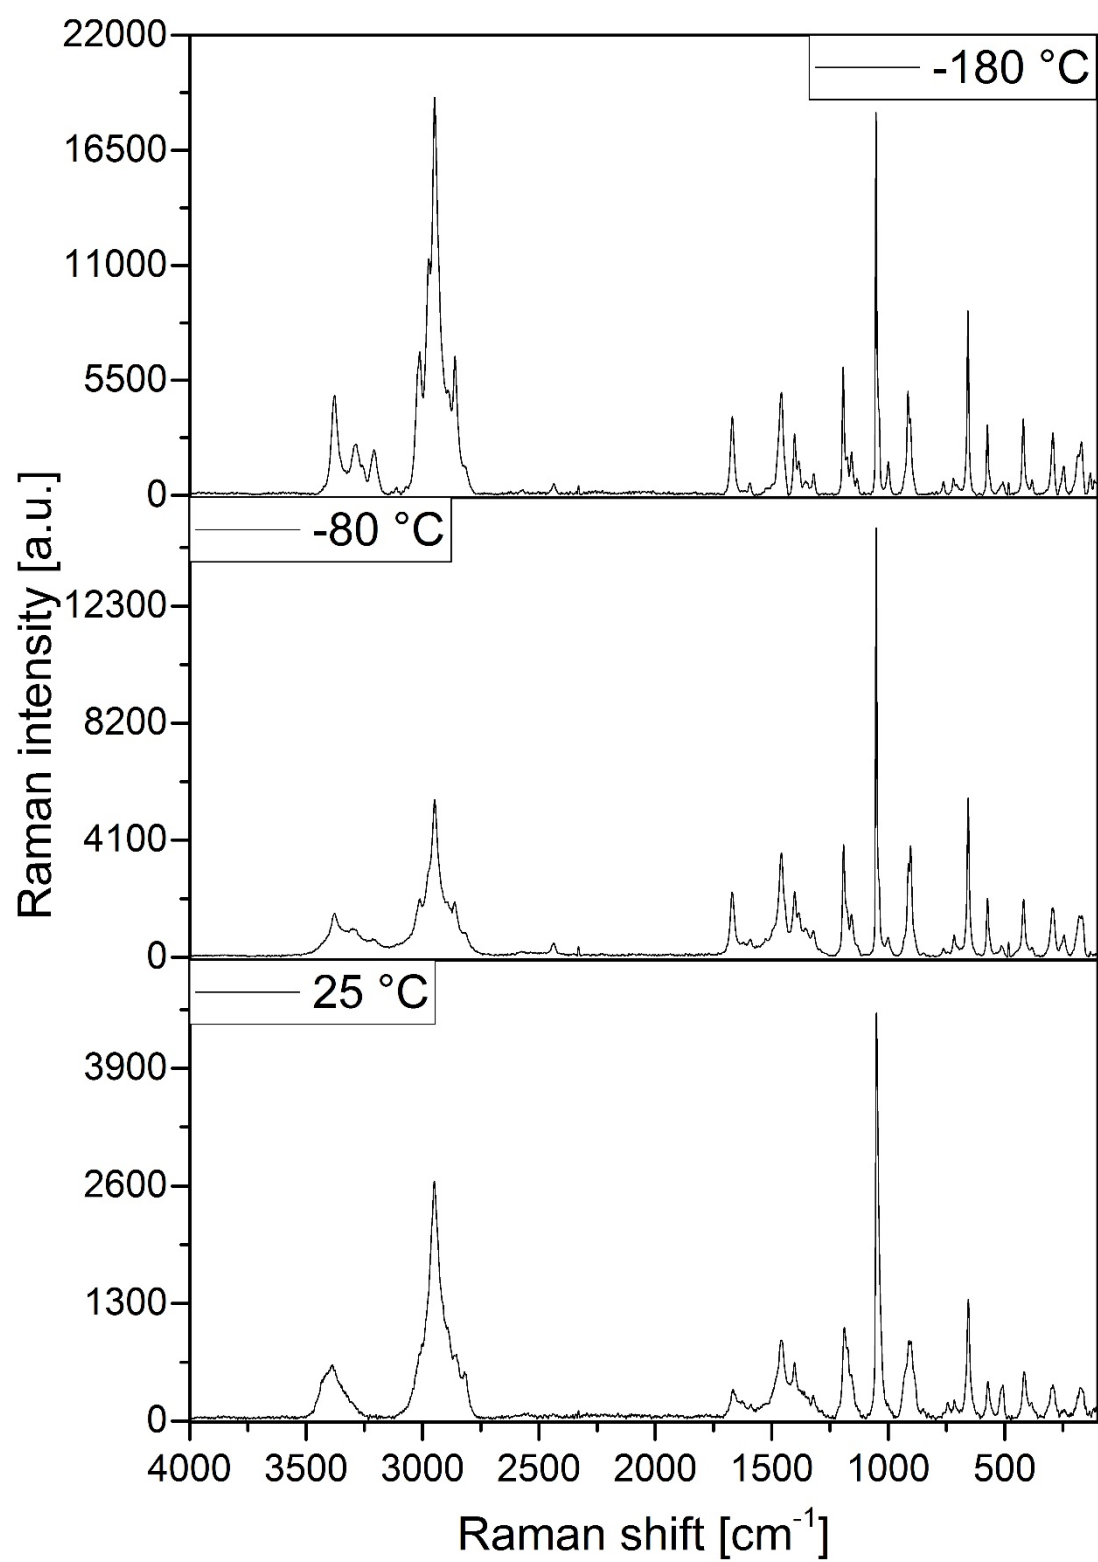

ESI Figure S12. Raman spectra of compound **1** at different temperature.

ESI Table S12. Assignment of vibrational modes of compound 1.

| Raman [cm <sup>-1</sup> ]<br>123 K - 532 nm                       | IR [cm <sup>-1</sup> ]<br>298 K                                           | Assignment<br>[C1,AA31]                                 |
|-------------------------------------------------------------------|---------------------------------------------------------------------------|---------------------------------------------------------|
| 3370 (s), 3286 (m)<br>3258 (sh), 3208 (m),<br>3111 (vw)           | 3374(s), 3289(s),<br>3208(m), 3111(m),<br>3071(sh)                        | $\nu_s, \nu_{as}$ (NH)                                  |
| 3012(s), 2973 (s),<br>2948(vs), 2890 (sh),<br>2861 (s), 2813 (sh) | 2972(m), 2949(m),<br>2886(sh), 2812(sh)                                   | $\nu_s, \nu_{as}$ (CH)                                  |
| 1669 (m)                                                          | -----                                                                     | $\nu$ (CN)                                              |
| 1616 (sh), 1593 (vw)                                              | 1621(s), 1595(vs)                                                         | $\delta$ (NH) + $\nu$ (CO)                              |
| 1520 (sh), 1497 (sh),                                             | 1493(w)                                                                   | ???                                                     |
| 1458 (m)                                                          | 1454(sh)                                                                  | $\delta_s$ (CH <sub>3</sub> )                           |
| 1425 (vw)                                                         | 1440(w)                                                                   | $\delta_{as}$ (CH <sub>3</sub> )                        |
| 1402 (m), 1384 (w),                                               | 1396(m), 1374(s)                                                          | $\nu_3$ (NO)                                            |
| 1354 (w), 1344 (sh)<br>1319 (w)                                   | 1336(s), 1280(sh)                                                         | $\delta$ (NH), $\nu$ (CN) ,<br>$\nu$ (C'N), $\nu$ (C-O) |
| 1193 (s), 1157 (w),<br>1134 (w)                                   | 1185(w), 1169(m),<br>1151(m)                                              | $\delta$ (NH)                                           |
| 1176 (w)                                                          | 1126(sh)                                                                  | $\delta_r$ (CH <sub>3</sub> )                           |
| 1052 (vs), 1038 (sh),<br>1000(w)                                  | 1099(sh), 1064(sh),<br>1047(m), 1037(sh)                                  | $\nu_1$ (NO), $\nu$ (CN)                                |
| 915 (m), 906 (m)                                                  | 901(m)                                                                    | $\delta_r$ (CH <sub>3</sub> ) <sub>o</sub>              |
| 793 (vw), 762 (vw)                                                | 829(w), 762(w)                                                            | $\nu_2$ (NO)                                            |
| 720 (vw)                                                          | 729(w), 716(w)                                                            | $\nu_4$ (NO)                                            |
| 706 (sh)                                                          | 700, 689(w)                                                               | $\pi$ (NH)                                              |
| 657 (s)                                                           | 653(w)                                                                    | $\delta$ (NCN)                                          |
| 574 (m), 564 (sh)                                                 | 566(m)                                                                    | $\pi$ (NH)                                              |
| 528 (sh), 514 (sh)<br>508 (vw) 483 (vw)                           | 522, 473, 458, 451,<br>435, 389, 346, 303,<br>248, 187, 157, 141,<br>129, | $\delta$ (NCN)                                          |
| 420 (m), 383 (vw)                                                 |                                                                           | Fe-O                                                    |
| 293 (m), 246 (w),<br>184 (w), 170 (w),<br>131 (vw), 115 (w)       |                                                                           | Lattice modes                                           |

\*our measurements; intensity: v – very, s – strong, m – medium, w – weak,

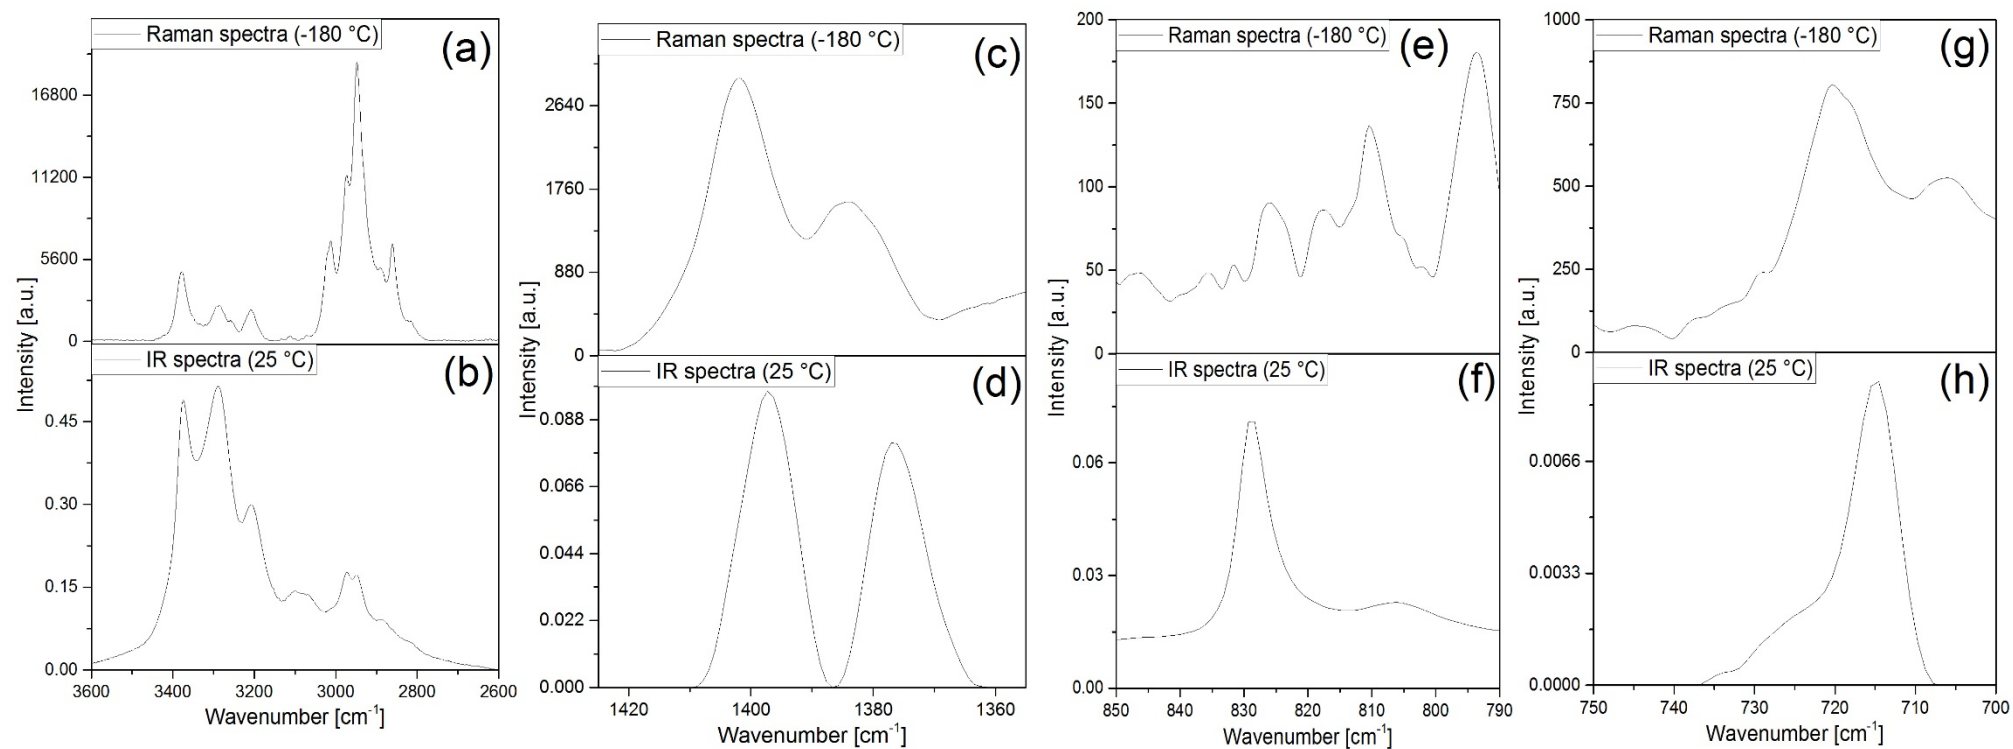

ESI Figure S13. Raman and IR spectra of compound **1** in different wavenumber regions.

ESI Table S13. Assignment of vibrational modes of compound 2.

| Raman [cm <sup>-1</sup> ]<br>123 K - 532 nm                                                                                  | IR [cm <sup>-1</sup> ]<br>298 K                                                              | IR of the<br>deuterated<br>sample [cm <sup>-1</sup> ]<br>298 K                         | Assignment [45]                                                                               |
|------------------------------------------------------------------------------------------------------------------------------|----------------------------------------------------------------------------------------------|----------------------------------------------------------------------------------------|-----------------------------------------------------------------------------------------------|
| 3442 (sh)                                                                                                                    | -----                                                                                        | 3420(w)                                                                                | $\nu_s, \nu_{as}(\text{OH})$                                                                  |
| 3404 (m)                                                                                                                     | 3410(s)                                                                                      |                                                                                        | $\nu_s, \nu_{as}(\text{OH and NH})$                                                           |
| 3342 (w), 3310 (sh),<br>3243 (m)                                                                                             | 3336(s), 3229(s)<br>3159(sh)                                                                 | 3342 (w)                                                                               | $\nu_s, \nu_{as}(\text{NH})$                                                                  |
| 3033 (sh), 3010 (m),<br>2942 (m), 2883 (sh),<br>2823 (m)                                                                     | 3026 (sh), 2946(s),<br>2888 (sh),                                                            | 2944(w), 2889(w),<br>2833(w)                                                           | $\nu_s, \nu_{as}(\text{CH})$                                                                  |
|                                                                                                                              |                                                                                              | 2590(sh), 2566(m),<br>2478(sh), 2411(m),<br>2359(m)                                    | $\nu_s, \nu_{as}(\text{ND})$                                                                  |
| 1667 (w), 1648 (w),<br>1614 (m), 1589 (sh)                                                                                   | 1642 (s), 1604 (sh)<br>1585 (vs)                                                             | 1581(s)                                                                                | $\nu(\text{CO}) + \nu(\text{CN}),$<br>$\delta(\text{NH}), \delta(\text{OH})$                  |
| 1527 (m)                                                                                                                     | 1514 (sh), 1497 (vs)                                                                         | 1528(vs), 1488(s)                                                                      | $\nu(\text{CN})$ and $\delta(\text{NH}_2)$                                                    |
| 1457 (m), 1450 (sh)                                                                                                          | 1457 (sh)                                                                                    | 1164(sh)                                                                               | $\delta_{as}(\text{CH}_3)$                                                                    |
| 1427 (m)                                                                                                                     | 1427(m), 1415 (sh)                                                                           | 1428(s), 1412(m)                                                                       | $\delta_s(\text{CH}_3)$                                                                       |
| 1376 (vw)                                                                                                                    | 1384 (s), 1309 (vs)                                                                          | 1381(m), 1328(s)                                                                       | $\nu_3(\text{NO})$                                                                            |
| 1288(sh), 1281 (w),<br>1263 (vw)                                                                                             | 1279(sh), 1255(sh)                                                                           | 1284(vs), 1258(sh)                                                                     | $\delta(\text{NH}) + \nu_s(\text{CN})$                                                        |
| -----                                                                                                                        | -----                                                                                        | 1178(w)                                                                                | $\delta(\text{OD}), \delta(\text{ND})$                                                        |
| 1149 (vw)                                                                                                                    | 1146(w)                                                                                      | 1156(sh)                                                                               | $\delta_r(\text{CH}_3)$                                                                       |
| 1101 (vw)                                                                                                                    | 1093 (m)                                                                                     | -----                                                                                  | $\delta_r(\text{NH}_2)$                                                                       |
| 1071 (sh), 1055 (vs)<br>1050 (vs)                                                                                            | 1062 (m), 1044(m)<br>1023(sh)                                                                | 1072(w), 1043(w)<br>1019(m)                                                            | $\delta_r(\text{CH}_3), \nu_1(\text{NO}),$<br>$\nu_s(\text{CN})$ and $\delta(\text{ND}_2)$    |
| -----                                                                                                                        | -----                                                                                        | 917(m)                                                                                 | $\delta_r(\text{ND}_2)$                                                                       |
| 821 (sh), 796 (s)                                                                                                            | 823 (w), 793(m)                                                                              | 837(vw), 827(w),<br>809(w), 790(vw)                                                    | $\nu_2(\text{NO})$                                                                            |
| 773 (vw)                                                                                                                     | 770(w), 752(m)                                                                               | 771(w), 750(sh),<br>745(w), 736(sh)                                                    | $\delta(\text{NCO})$                                                                          |
| 719 (sh), 713 (w)                                                                                                            | 722(sh), 707(sh)                                                                             | 719(vw), 700(vw)                                                                       | $\pi(\text{NH}_2)$ and $\nu_4(\text{NO})$                                                     |
| 636 (m), 606 (m)                                                                                                             | 634 (m), 601 (m)                                                                             | 630(w), 621(w),<br>596(w)                                                              | $\delta(\text{CO})$                                                                           |
| 551(w), 545(sh)                                                                                                              | 546 (m) 520(sh)                                                                              | 507(w), 497(w),<br>482(vw)                                                             | $\delta(\text{NCN}), \pi(\text{ND}_2)$                                                        |
| 443 (m),                                                                                                                     | 469 (sh), 436 (sh),                                                                          | 464(vw), 427(w),                                                                       | $\rho_r(\text{H}_2\text{O})$                                                                  |
| 428 (m), 417 (m)<br>374 (w), 351 (w)<br>311 (vw), 300 (sh),<br>282 (w), 238 (w),<br>216 (sh), 207 (w),<br>194 (w), 143 (vw), | 419 (sh), 376 (w),<br>360 (w), 320 (vw),<br>265 (sh), 247 (w),<br>207(w), 175(w),<br>147(vw) | 394(sh)<br>373(m), 315(w),<br>243(w), 202(w),<br>186(w), 157(sh),<br>147(vw), 133(vw), | $\nu(\text{Fe-O}), \nu(\text{Fe-OH}_2),$<br>$\rho_r(\text{D}_2\text{O})$ and lattice<br>modes |

intensity: v – very, s – strong, m – medium, w – weak,

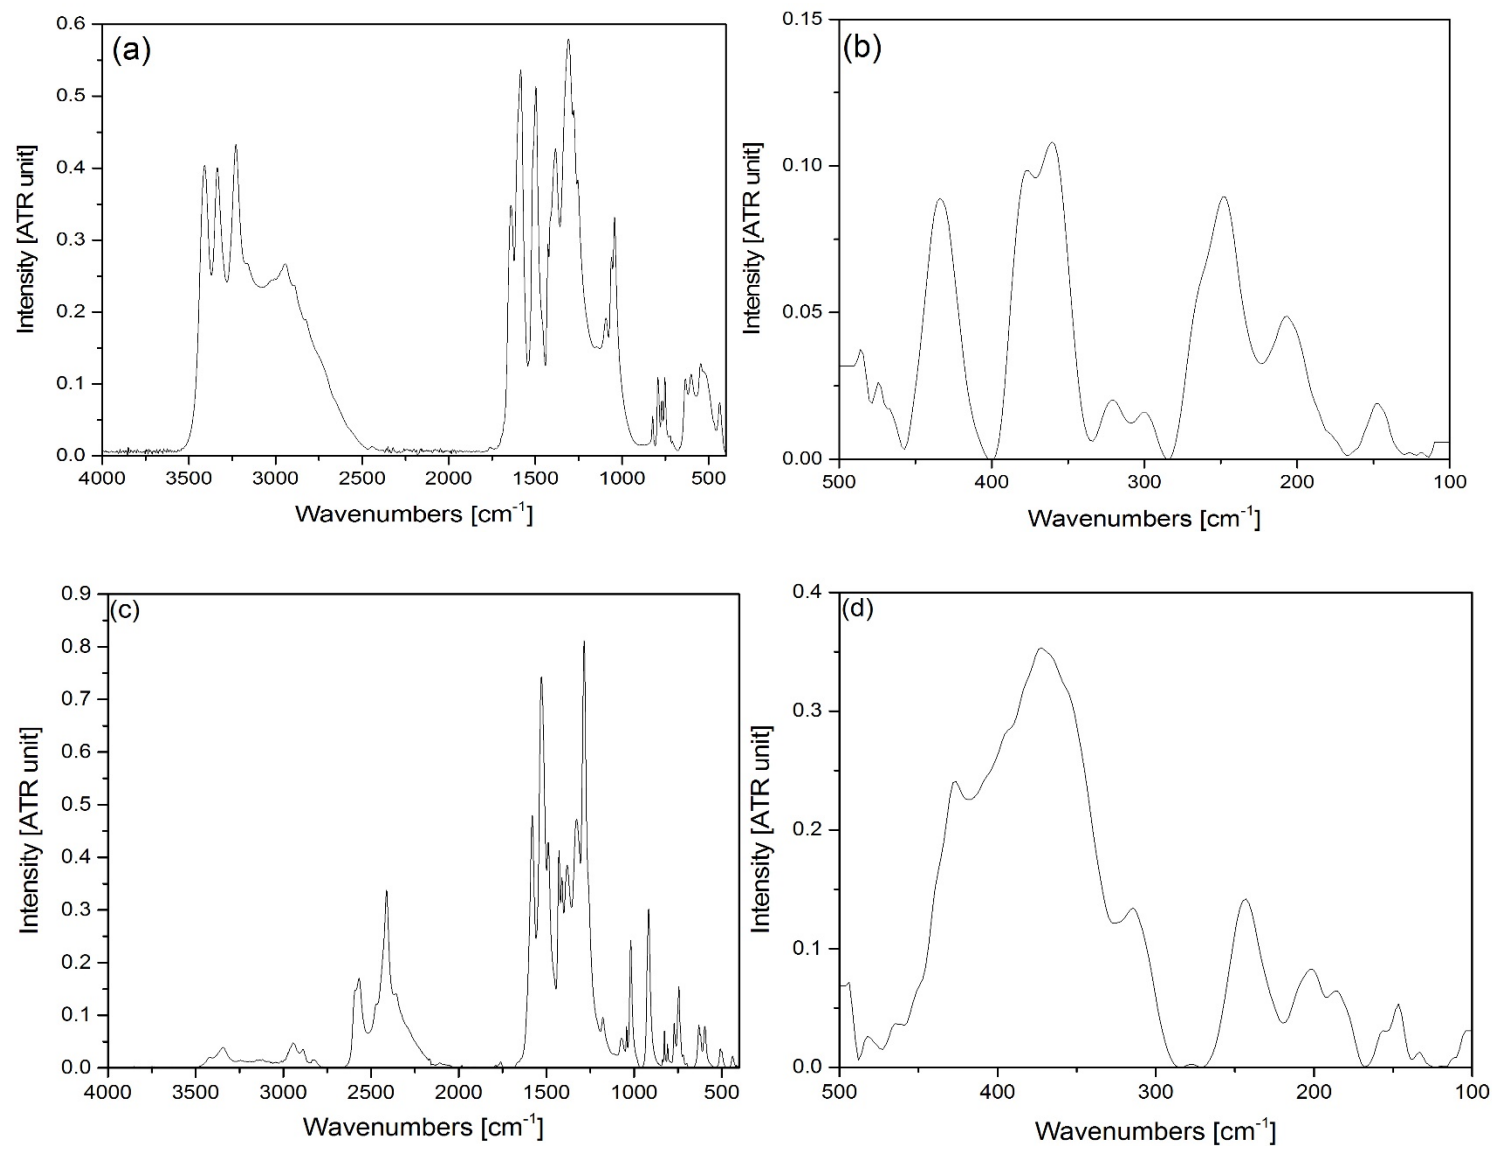

ESI Figure S14. (a) Close range and (b) Far-range IR spectra of compound **2**. (c) Close range and (d) Far-range IR spectra of compound **2-D<sub>12</sub>**.

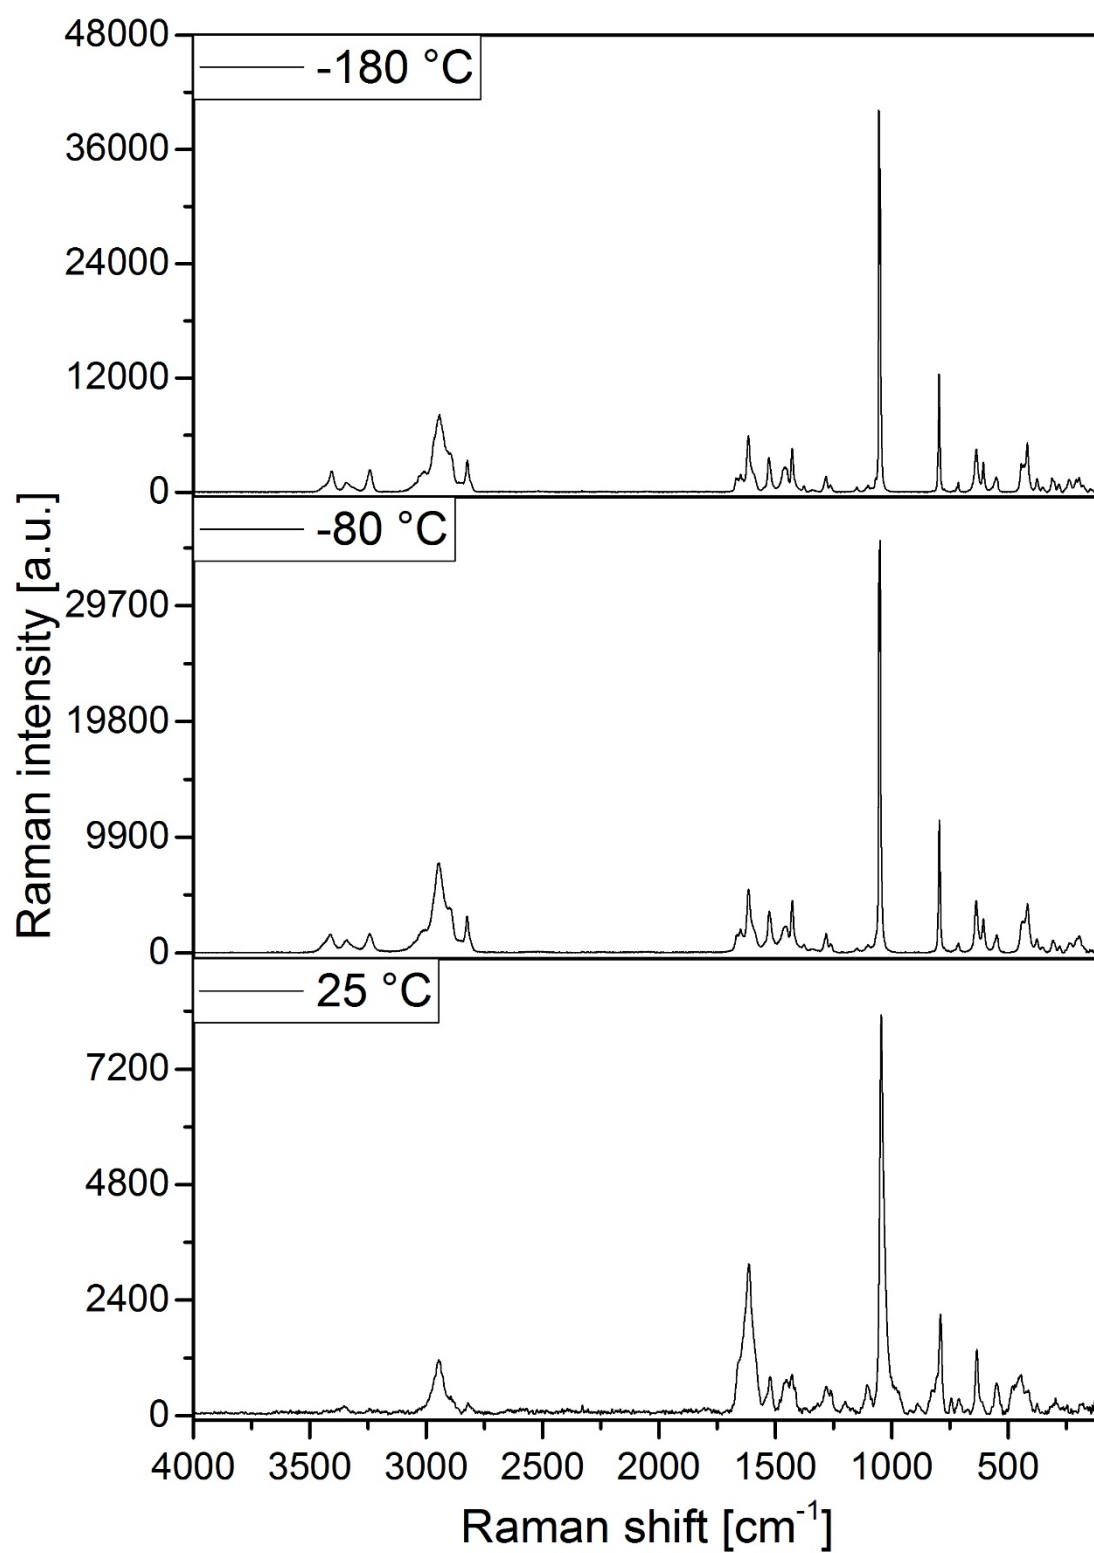

ESI Figure S15. Raman spectra of compound **2** at different temperature.

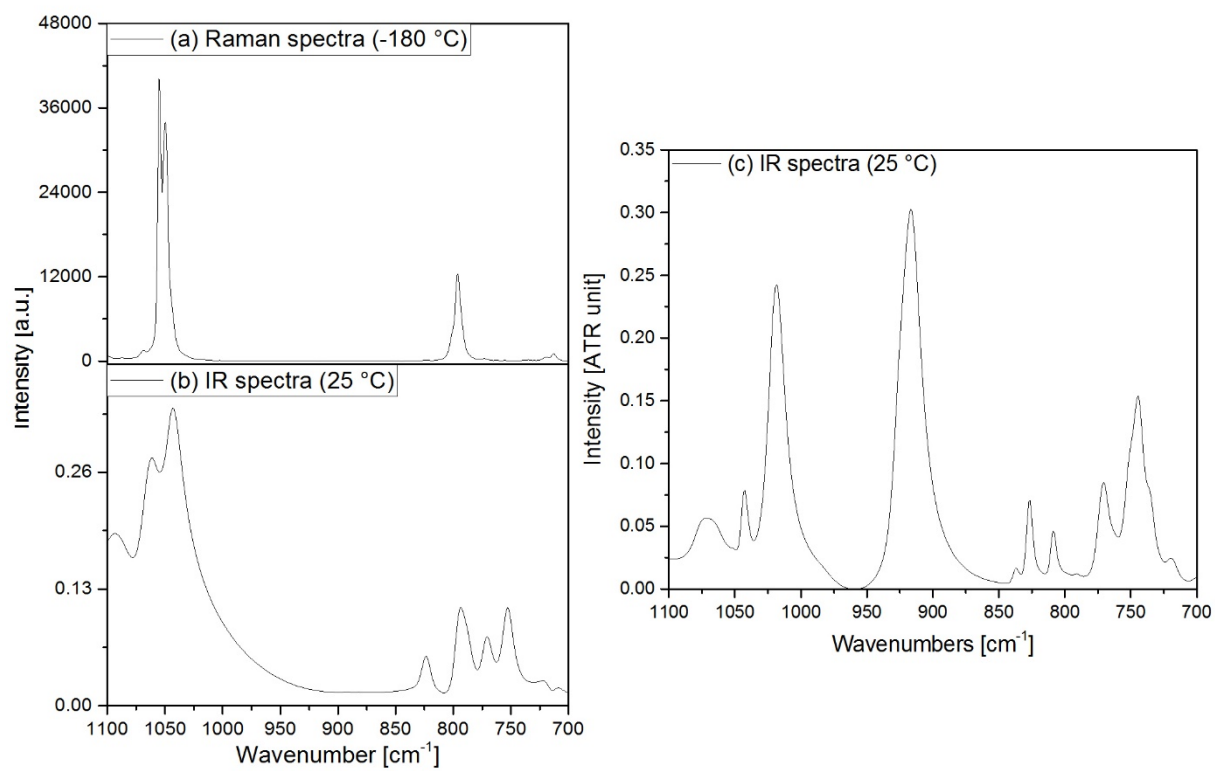

ESI Figure S16. Raman and IR spectra of compound **2** and **2-D<sub>12</sub>** in 1100 and 700  $\text{cm}^{-1}$  wavenumber region.

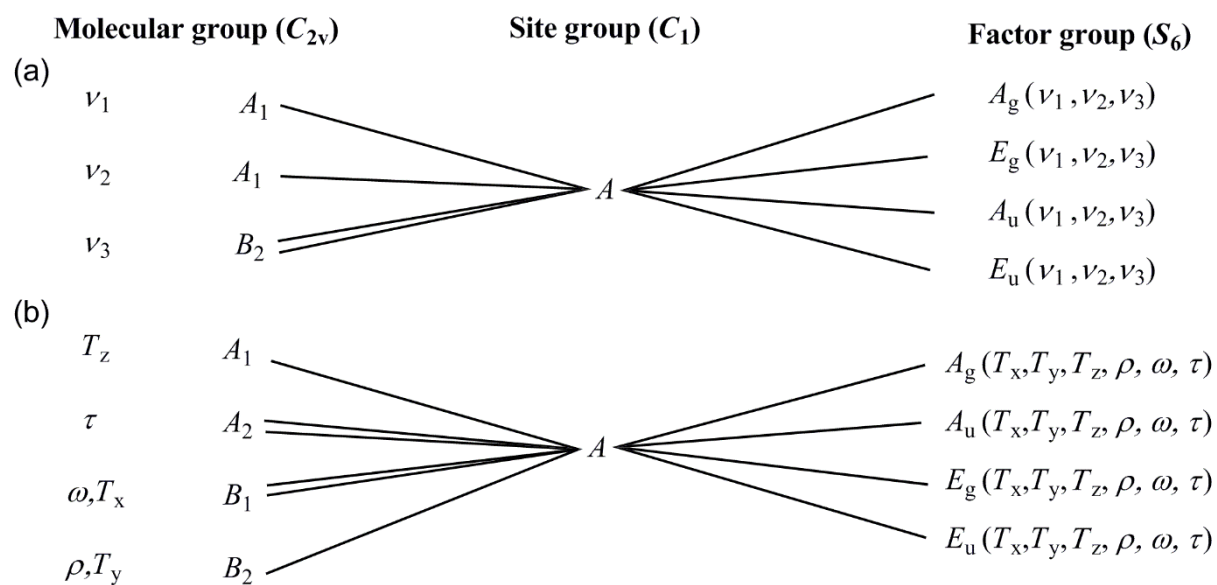

ESI Figure S17. (a) Internal and (b) external H<sub>2</sub>O modes in compound **2**.

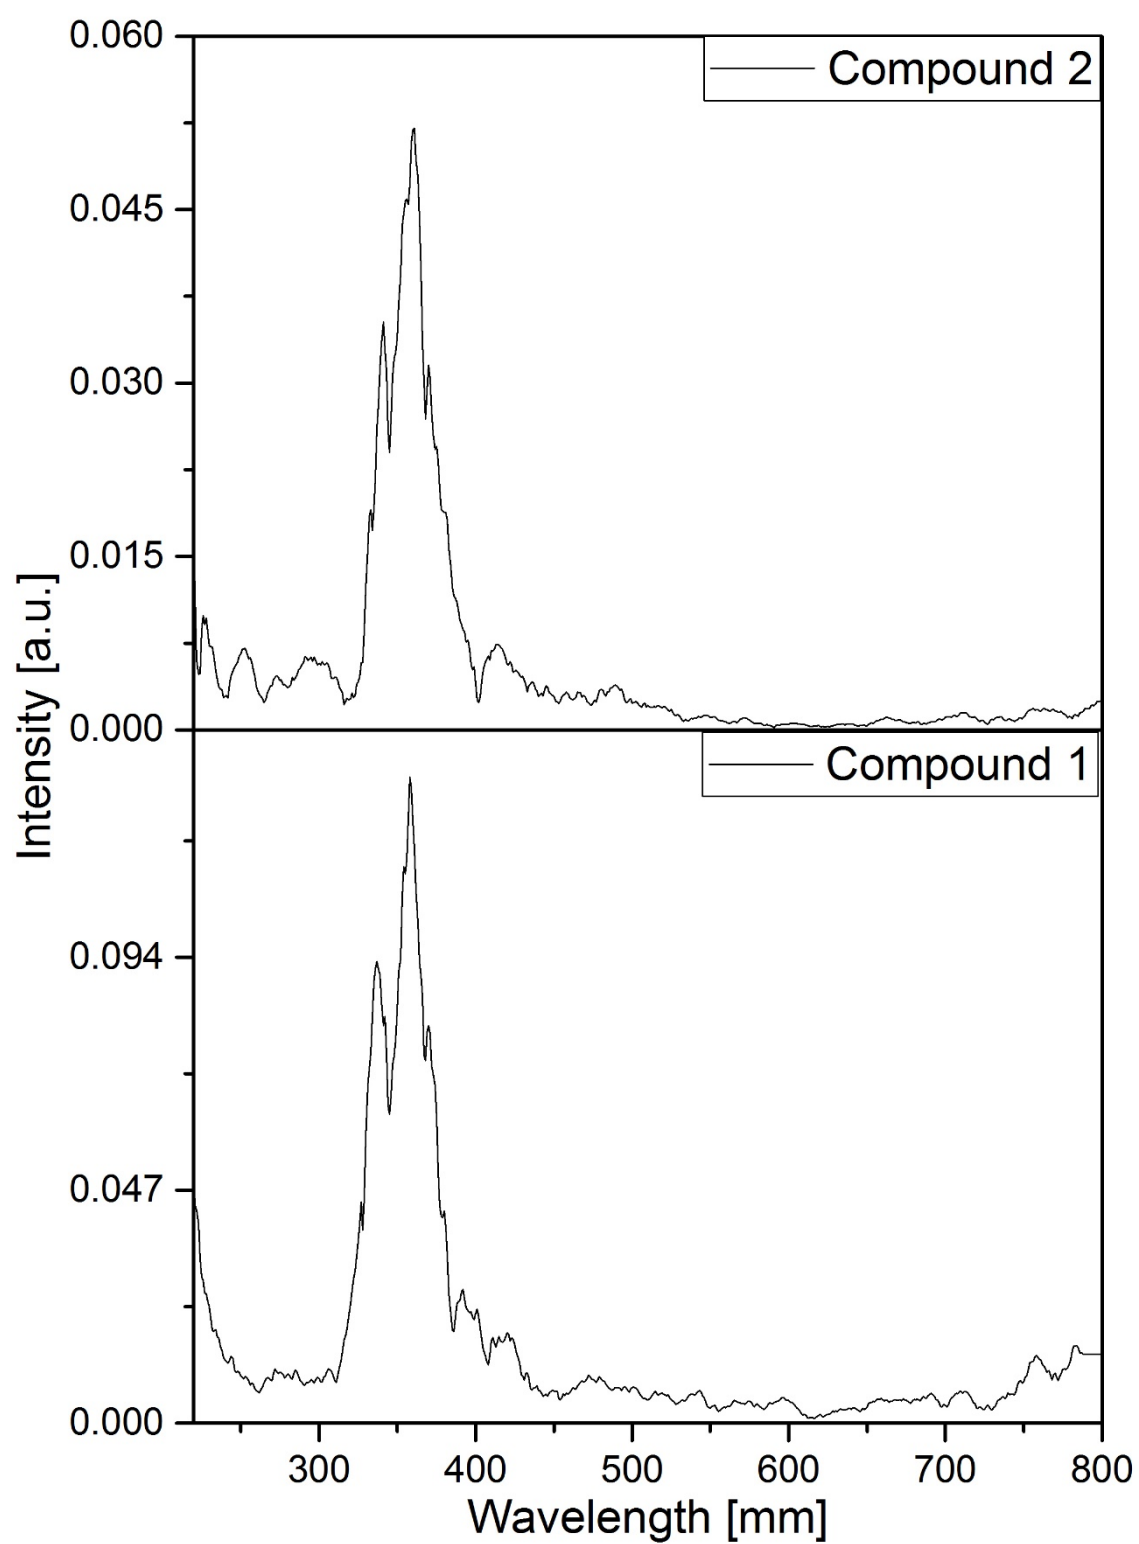

ESI Figure S18. UV-VIS spectra of compound 1 and compound 2.
